# 1 Modulating D1 rather than D2 receptor-expressing spiny-projection 2 neurons corresponds to optimal antipsychotic effect

3 Seongsik Yun, Ben Yang, Madison M. Martin, Nai-Hsing Yeh, Anis Contractor, & Jones G.  
4 Parker

## 5 6 Abstract

---

7 Overactive dopamine transmission in psychosis is predicted to unbalance striatal output via D1-  
8 and D2-dopamine receptor-expressing spiny-projection neurons (SPNs). Antipsychotic drugs are  
9 thought to re-balance this output by blocking D2-receptor signaling. Here we imaged D1- and  
10 D2-SPN  $Ca^{2+}$  dynamics in mice to determine the neural signatures of antipsychotic effect. Ini-  
11 tially we compared effective (clozapine and haloperidol) antipsychotics to a candidate drug that  
12 failed in clinical trials (MP-10). Clozapine and haloperidol normalized hyperdopaminergic D1-  
13 SPN dynamics, while MP-10 only normalized D2-SPN activity. Clozapine, haloperidol or  
14 chemogenetic manipulations of D1-SPNs also normalized sensorimotor gating. Given the sur-  
15 prising correlation between clinical efficacy and D1-SPN modulation, we evaluated compounds  
16 that selectively target D1-SPNs. D1R partial agonism, antagonism, or positive M4 cholinergic  
17 receptor modulation all normalized the levels of D1-SPN activity, locomotion, and sensorimotor  
18 gating. Our results suggest that D1-SPN activity is a more relevant therapeutic target than D2-  
19 SPN activity for the development of effective antipsychotics.

## 20 Main

---

21 Antipsychotic drugs have been used to manage the symptoms of psychotic disorders for over half  
22 a century. Very early on, it was recognized that excess dopamine might contribute to psychosis<sup>1</sup>,  
23 and that antipsychotic drugs may act on the dopamine system<sup>2</sup>. A close association between D2-  
24 like dopamine receptor binding and antipsychotic effect bolstered this idea<sup>3</sup> and a dopamine hy-  
25 pothesis for psychotic disorders like schizophrenia or the mechanistic basis of the drugs for these  
26 disorders<sup>4</sup>. Since that time, intense therapeutic development efforts have sought to further fine  
27 tune D2-like receptor signaling. These efforts yielded compounds with lower D2 receptor (D2R)  
28 binding affinities<sup>5</sup>, selectivity for specific D2-like receptors<sup>6</sup>, partial agonists that 'stabilize' D2R  
29 signaling<sup>7</sup>, functionally selective D2R ligands<sup>8</sup>, and compounds that target signaling pathways  
30 downstream from D2Rs<sup>9</sup>. Despite these remarkable pharmacological advances, comparatively  
31 little progress has been made in terms of the real-world efficacy of antipsychotic treatments.  
32 Given this discrepancy, there is an immediate need to understand the effects of these drugs on  
33 the function of intact neural circuits that are thought to underlie psychosis.

34 In schizophrenia, increased dopamine transmission is thought to imbalance the rates of  
35 activity in the striatum's principal output neurons, the D1R- and D2R-expressing spiny projec-  
36 tion neurons (SPNs)<sup>10</sup>. Specifically, activation of  $G\alpha_s$ -coupled D1Rs and  $G\alpha_i$ -coupled D2Rs is  
37 predicted to increase D1- and decrease D2-SPN activity<sup>11</sup>. D1- and D2-SPNs input to the direct  
38 and indirect basal ganglia pathways, respectively, which converge to modulate basal ganglia out-  
39 put to the thalamus. In theory, treatments that normalize the activity of either or both SPN types  
40 could normalize basal ganglia output. However, the receptor pharmacology of antipsychotic  
41 drugs predicts that they preferentially normalize D2-SPN activity. However, whether increased

42 dopamine unbalances D1- and D2-SPN activity and whether antipsychotic drugs normalize this  
43 imbalance through selective effects on D2-SPNs has never been directly tested *in vivo*.

44       Using a miniature microscope to image D1- and D2-SPN  $\text{Ca}^{2+}$  activity *in vivo*, we and  
45 others showed that D1- and D2-SPNs co-activate in spatially clustered ensembles and scale their  
46 levels of activity with locomotor speed in a balanced manner<sup>12, 13</sup>. Conditions modeling parkin-  
47 sonism and dyskinesia disrupt both the levels and spatially clustered dynamics of D1- and D2-  
48 SPN activity<sup>12</sup>. Importantly, the extent to which mainstay or candidate treatments for Parkinson's  
49 disease normalize these dynamics is more predictive real-world efficacy than behavioral  
50 measures in an animal model of parkinsonism<sup>12</sup>. Given the great number of neurological and  
51 psychiatric diseases for which striatal dysfunction is implicated<sup>14-20</sup>, the ability to examine how  
52 these dynamics are disrupted in other disease states and normalized by their treatments is a pow-  
53 erful tool for understanding brain pathophysiology and therapeutic effect.

54       In the present study, we recorded D1- and D2-SPN  $\text{Ca}^{2+}$  activity in the dorsomedial stria-  
55 tum (DMS) to determine how antipsychotic drugs modulate their dynamics under normal and hy-  
56 perdopaminergic conditions. Initially we sought to use this readout to determine whether we  
57 could distinguish between antipsychotic drugs or drug candidates with varying clinical efficacies  
58 and side-effect profiles. Specifically, we compared two effective antipsychotics (clozapine and  
59 haloperidol) and one ineffective antipsychotic drug candidate (MP-10)<sup>9, 21</sup>. Presently, the differ-  
60 ent efficacies and side-effect propensities of antipsychotic drugs are best understood by their dif-  
61 ferent brain receptor binding profiles<sup>22</sup>. For instance, D2R binding is thought to underlie the anti-  
62 psychotic effects of clozapine and haloperidol. However, haloperidol's greater selectivity and  
63 binding affinity for D2Rs is thought to underlie its greater propensity for motor side effects like

64 parkinsonism and dyskinesia. Likewise, clozapine's greater affinity for serotonin receptors may  
65 underlie its superior antipsychotic efficacy.

66         Although this taxonomical approach is extremely useful, D2 and the other receptors  
67 bound by antipsychotic drugs are widely distributed throughout the brain, making it difficult to  
68 link a specific drug's receptor interactions to its specific therapeutic profile. MP-10 exemplifies  
69 the limitations of linking specific disease symptoms to receptor signaling pathways in this way.  
70 MP-10 inhibits PDE10A, a striatally enriched enzyme whose inhibition increases the levels of  
71 the second-messenger cAMP in the striatum<sup>23</sup>. Because D2R signaling inhibits cAMP produc-  
72 tion<sup>11</sup>, MP-10 effectively recapitulates D2R antagonism with specificity for the striatum. Given  
73 the strong linkage between striatal D2R binding and antipsychotic effect, MP-10 was predicted  
74 to be antipsychotic, with possibly fewer of the adverse effects associated with brain-wide D2R  
75 antagonism. Although this prediction is logical within a receptor-symptom conceptual frame-  
76 work, MP-10 had no antipsychotic effect in patients with schizophrenia<sup>9</sup>.

77         In terms of behavior, clozapine, haloperidol, and MP-10 all suppressed basal locomotion  
78 and attenuated hyperlocomotion following treatment with the dopamine releaser amphetamine. A  
79 drug's ability to suppress of amphetamine-driven locomotion in rodents is a common indicator of  
80 antipsychotic potential. However, not every drug that attenuates amphetamine-driven locomotion  
81 also has antipsychotic activity. MP-10 is one of many such examples that underscore the limited  
82 predictive value of this assay, particularly when behavior is the primary readout. In terms of neu-  
83 ral activity, we found that amphetamine treatment increased D1- and decreased D2-SPN activity  
84 levels, and differentially altered their spatiotemporal dynamics. Despite their similar effects on  
85 locomotion, clozapine, haloperidol and MP-10 each had distinct effects on these hyperdopamin-  
86 ergic ensemble dynamics. Surprisingly, the selective normalization of D1-, rather than D2-SPN

87 dynamics was associated with clinical antipsychotic effect, and the ineffective drug candidate  
88 (MP-10) actually exacerbated amphetamine's effects on D1-SPN activity. Thus, by examining  
89 the neural, rather than behavioral correlates of antipsychotic drug effect, we could retrospectively  
90 distinguish between three drugs known to have different clinical efficacies.

91         Given the correlation between D1-SPN modulation and clinical antipsychotic effect, we  
92 asked whether D1-SPN modulation was sufficient to normalize amphetamine-driven changes in  
93 behavior. Chemogenetic inhibition of D1-SPNs in the DMS was sufficient to normalize amphet-  
94 amine-driven hyperlocomotion and deficits in sensorimotor gating, another common behavioral  
95 measures of antipsychotic drug potential. Next we tested whether compounds targeting receptors  
96 enriched in D1-SPNs might be therapeutically active for dopamine-driven psychosis. Three com-  
97 pounds targeted to either D1Rs (SKF38393 and SCH23390) or M4 cholinergic receptors  
98 (VU0467154)<sup>24</sup> all normalized hyperdopaminergic D1-SPN dynamics and behavioral measures  
99 of antipsychotic drug potential.

100         Taken together, our results highlight the power of a neural ensemble imaging approach  
101 for distinguishing between treatments for brain diseases like psychosis and for uncovering the  
102 mechanistic basis for their efficacy. This approach has uncovered the surprising finding that tar-  
103 geting D1-SPNs may provide greater therapeutic benefit than traditional D2R-based antipsy-  
104 chotic treatments. This new perspective and its underlying technical advances provide a frame-  
105 work for developing novel and potentially more comprehensive treatments for psychosis.

106

## 107 Results

---

108 D1- and D2-SPN dynamics under normal and hyperdopaminergic condi-  
109 tions

110 To record D1- or D2-SPN activity *in vivo*, we used a virus to conditionally express the fluores-  
111 cent  $\text{Ca}^{2+}$  indicator GCaMP7f in the DMS of *Drd1a<sup>Cre</sup>* (D1-Cre) or *Adora2a<sup>Cre</sup>* (A2A-Cre) mice,  
112 respectively. We implanted an optical guide tube and microendoscope into the DMS and  
113 mounted the mice with a miniature fluorescence microscope (**Fig. 1a** and **Extended Data Fig.**  
114 **1a**). This approach allowed us to monitor  $\text{Ca}^{2+}$  activity in hundreds of individual D1- or D2-  
115 SPNs as mice freely explored an open field arena (**Fig. 1b**;  $233 \pm 11$  D1-SPNs over 189 imaging  
116 sessions and  $161 \pm 10$  D2-SPNs over 172 sessions; mean  $\pm$  s.e.m). D1- and D2-SPNs had similar  
117 event rates and similarly increased their levels of activity with locomotor speed (**Fig. 1c** "Vehi-  
118 cle" and **Extended Data Fig. 1b**). Under control conditions,  $\text{Ca}^{2+}$  event rates were  $0.5 \pm 0.05$   
119  $\text{events} \cdot \text{min}^{-1}$  for D1-SPNs and  $0.6 \pm 0.08$   $\text{events} \cdot \text{min}^{-1}$  for D2-SPN during periods of rest (loco-  
120 motor speed  $< 0.5 \text{ cm} \cdot \text{s}^{-1}$ ). During periods of movement (speed  $\geq 0.5 \text{ cm} \cdot \text{s}^{-1}$ ) D1-SPNs had  
121 rates of  $1.6 \pm 0.07$   $\text{events} \cdot \text{min}^{-1}$  and D2-SPNs had rates of  $1.8 \pm 0.1$   $\text{events} \cdot \text{min}^{-1}$  ( $P = 0.5$  for rest  
122 and  $P = 0.2$  for movement;  $N = 11$  D1-Cre and 10 A2A-Cre mice; Wilcoxon rank-sum test).  
123 Consistent with previous findings, D1- and D2-SPNs both exhibited spatiotemporally coordi-  
124 nated patterns of activity, whereby proximal pairs of cells (separated 25–125  $\mu\text{m}$ ) had more tem-  
125 porally overlapped  $\text{Ca}^{2+}$  events than distal cell pairs (**Extended Data Fig. 1c**)<sup>12</sup>. In contrast to the  
126 overall levels of D1- and D2-SPN activity, this co-activity among proximal cell pairs decreased  
127 with increased locomotor speed (**Extended Data Fig. 1d**). To account for the relationship be-

128 tween locomotor speed and these parameters of D1- and D2-SPN activity, we performed all sub-  
129 sequent analyses as a function of each mouse's running speed.

130 To determine how the increased striatal dopamine release in diseases such as psychosis,  
131 may affect these D1- and D2-SPN ensemble dynamics, we treated mice with amphetamine,  
132 which induces an efflux of cytoplasmic dopamine through dopamine transporter<sup>25</sup>. Consistent  
133 with excitatory D1R and inhibitory D2R activation, amphetamine treatment (2.5 mg·kg<sup>-1</sup>) in-  
134 creased D1- and decreased D2-SPN activity levels (**Fig. 1c**). These effects were dependent on  
135 locomotor speed, with greater D1-SPN activation during periods of rest and more D2-SPN sup-  
136 pression during movement (**Fig. 1c–e**). Amphetamine treatment also differentially altered the  
137 spatiotemporal dynamics of D1- and D2-SPNs in a speed-dependent manner (**Fig. 1f**). Ampheta-  
138 mine disruption of proximal D1-SPN co-activity and augmentation of proximal D2-SPN co-ac-  
139 tivity were most pronounced during periods of rest and movement, respectively (**Fig. 1f–h**).  
140 Taken together, amphetamine treatment diametrically altered the levels and spatiotemporal dy-  
141 namics of D1- and D2-SPN ensembles.

## 142 The neural ensemble correlates of antipsychotic drug efficacy

143 Next we asked whether we could use these dynamics to distinguish between three antipsychotic  
144 drugs with different clinical efficacies and side-effect profiles. We compared clozapine, a highly  
145 efficacious antipsychotic with few motor side effects, to haloperidol, a moderately efficacious  
146 antipsychotic with a high motor side effect propensity, and MP-10, an antipsychotic drug candi-  
147 date that recently failed in a clinical trial for schizophrenia<sup>26, 27</sup>.

148 We monitored behavior and recorded D1- or D2-SPN Ca<sup>2+</sup> activity following treatment  
149 with vehicle or a low/high dose of each drug followed by amphetamine (**Fig. 2a**). Under normal  
150 conditions, during 15-min before amphetamine treatment, both high and low doses of all three

151 drugs inhibited locomotor activity (**Fig. 2b** and **Extended Data Fig. 2a**). Despite their similar  
152 effects on locomotion under normal conditions, the profiles of each drug's effects on D1- and  
153 D2-SPN activity levels differed. Clozapine treatment selectively increased D1-SPN activity,  
154 haloperidol increased both D1- and D2-SPN activity at the higher dose, while MP-10 only in-  
155 creased D2-SPN activity (**Fig. 2c, d**). By contrast, all three drugs had similarly negligible effects  
156 on the degree of spatiotemporally coordinated D1- and D2-SPN activity at either dose (**Ex-**  
157 **tended Data Fig. 3a, b**).

158 Under hyperdopaminergic conditions, both doses of all three drugs diminished ampheta-  
159 mine-driven hyperlocomotion (**Fig. 2b** and **Extended Data Fig. 2a**). Despite their comparable  
160 effects on behavior, the drugs differentially reversed the altered levels and spatiotemporal dy-  
161 namics of D1- and D2-SPN activity. Both clozapine and haloperidol normalized the spatiotem-  
162 porally de-correlated D1-SPN hyperactivity after amphetamine, while MP-10 exacerbated D1-  
163 SPN hyperactivity and had no effects on proximal D1-SPN co-activity (**Fig. 3a, b**). By compari-  
164 son, MP-10 completely normalized the hyper-correlated D2-SPN hypo-activity with ampheta-  
165 mine, while haloperidol selectively normalized D2-SPN hypoactivity, and clozapine had no ef-  
166 fects on the hyperdopaminergic ensemble dynamics of D2-SPNs (**Fig. 3c, d**). Taken together,  
167 our results show that the two clinically efficacious drugs normalized D1-SPN dynamics, while  
168 the inefficacious drug MP-10 only normalized D2-SPN dynamics under hyperdopaminergic con-  
169 ditions (**Fig. 3e**). Moreover, the most clinically efficacious drug clozapine exclusively normal-  
170 ized D1-SPN activity.

171 Given their disparate effects on D1- and D2-SPN activity but equivalent effects on am-  
172 phetamine-driven locomotion, we next asked whether another behavioral assay might differenti-  
173 ate these three drugs treatment. In addition normalizing amphetamine-driven hyperlocomotion,



174 antipsychotic drugs also normalize the disruption of sensorimotor gating as measured in rodents  
175 by pre-pulse inhibition (PPI)<sup>28</sup>. We pretreated mice with vehicle or a high dose of each antipsy-  
176 chotic drug followed by vehicle or amphetamine and measured PPI (**Fig. 3f**). Amphetamine  
177 treatment disrupted PPI at all pre-pulse intensities, but only clozapine and haloperidol, which re-  
178 versed amphetamine's effects on D1-SPN activity, also normalized PPI (**Fig. 3g, h**).

179 Chemogenetic D1-SPN inhibition normalizes amphetamine-induced loco-  
180 motion and PPI deficits

181 Given that clozapine and haloperidol normalized D1-SPN hyperactivity but the clinically inef-  
182 fective drug MP-10 did not, we next asked whether modulating D1-SPNs is sufficient to sup-  
183 press amphetamine-driven changes in locomotion and PPI (**Fig. 2b** and **Fig. 3g**). To do this, we  
184 used viruses to express an inhibitory DREADD (DIO-hM4D(G<sub>i</sub>)-mCherry) or a control fluoro-  
185 phore (DIO-mCherry) in the DMS of D1-Cre mice<sup>29</sup> (**Fig. 4a** and **Extended Data Fig. 4a**). The  
186 highly selective and brain penetrant DREADD agonist deschloroclozapine<sup>30</sup> (DCZ) suppressed  
187 current-induced D1-SPN spiking in brain slices from experimental mice (**Extended Data Fig.**  
188 **4b–d**). DCZ treatment (10 µg·kg<sup>-1</sup>) also attenuated amphetamine-driven hyperlocomotion and  
189 deficits in PPI in experimental, but not control mice (**Fig. 4b, c**). These effects were less pro-  
190 nounced than systemic clozapine or haloperidol treatment, which may reflect the fact that our vi-  
191 rus injections were only in the DMS and did not transduce every D1-SPN (**Extended Data Fig.**  
192 **4a**). These results imply that counteracting the effects of a hyperdopaminergic state by modulat-  
193 ing the activity of D1-SPNs is sufficient to modulate these behaviors in a manner that is con-  
194 sistent with antipsychotic effect.

195 Therapeutically targeting D1-SPNs normalizes their dynamics and behavior

196 Given that the selective modulation of hyperdopaminergic D1-SPN dynamics was associated  
197 with optimal antipsychotic effect, we investigated other therapeutic strategies for targeting these  
198 dynamics. Specifically, we focused on three drugs that we predicted would decrease D1-SPN  
199 activity under hyperdopaminergic conditions. (1) VU0467154 is a positive allosteric modulator  
200 of inhibitory  $G\alpha_i$ -coupled M4 muscarinic acetylcholine receptors (M4-PAM) which are specifi-  
201 cally expressed in D1-, but not D2-SPNs<sup>24, 31</sup>, (2) SCH23390 is a selective antagonist of excita-  
202 tory  $G\alpha_s$ -coupled D1Rs, and (3) SKF38393 is a D1R partial agonist that we predicted would se-  
203 lectively suppress D1-SPN activity under hyperdopaminergic conditions. We used the same im-  
204 aging and drug administration procedures to determine how each of these drugs affects D1- and  
205 D2-SPN activity under normal and hyperdopaminergic conditions (**Fig. 5a**).

206 Under normal conditions, both doses of VU0467154 and SCH23390 decreased, while  
207 SKF38393 increased locomotor speed (**Fig. 5b** and **Extended Data Fig. 2b**). Despite reducing  
208 locomotion, VU0467154 treatment had no effect on the rates of D1- or D2-SPN activity during  
209 either rest or movement. By contrast, the high dose of SCH23390 decreased D1- and increased  
210 D2-SPN activity, and the higher SKF38393 dose increased activity levels in both SPN types  
211 (**Fig. 5c, d**). Despite the different profiles of their effects on SPN activity levels and locomotion,  
212 none of the drugs affected the degree of proximal D1- or D2-SPN activity (**Extended Data Fig.**  
213 **3c, d**).

214 Under hyperdopaminergic conditions, pre-treatment with all three drugs dose-de-  
215 pendently reduced hyperlocomotion (**Fig. 5b** and **Extended Data Fig. 2b**). Likewise, all three  
216 compounds normalized D1-SPN hyperactivity following amphetamine treatment, though only  
217 VU0467154 and SCH23390 also normalized the degree of proximal D1-SPN co-activity (**Fig.**

218 **6a, b**). The low dose of SCH23390 was the only treatment that normalized D2-SPN hypoactiv-  
219 ity, and none of the compounds had any effects on the spatiotemporal coordination of activity in  
220 D2-SPNs (**Fig. 6c, d**). In summary, the three compounds had similar effects on amphetamine-  
221 driven hyperlocomotion and the levels of D1-SPN activity, but varied in their profile of effects  
222 on other D1- and D2-SPN ensemble dynamics (**Fig. 6e**).

223         Given that D1-SPN suppression was associated with the normalization of PPI under hy-  
224 perdopaminergic conditions (**Fig. 4c**), we predicted that all three of the D1-SPN-targeted com-  
225 pounds tested here would normalize amphetamine-driven deficits in PPI. Consistent with this  
226 prediction, pretreating mice with VU0467154, SCH23390, or SKF38393 all prevented the dis-  
227 ruption of PPI by amphetamine (**Fig. 6f, g**). Taken together, these results highlight the potential  
228 utility of targeting D1-SPN hyperactivity for antipsychotic effect and delineate logical strategies  
229 for doing so.

## 230 Discussion

---

231 For decades we have known that dysfunctional dopamine signaling contributes to psychosis and  
232 that the efficacy of antipsychotic drugs depends upon their effects on the dopamine system.  
233 However, the lack of appropriate tools has hindered our understanding of how dopamine dys-  
234 function and antipsychotic drug treatment affect the function of neural circuits within the dopa-  
235 mine system. Here we applied advanced  $\text{Ca}^{2+}$  imaging and analysis approaches to define how an-  
236 tipsychotic drugs affect D1- and D2-SPN dynamics *in vivo*, under normal and hyperdopaminer-  
237 gic conditions. Monitoring neural ensemble activity allowed us to differentiate between antipsy-  
238 chotic drugs, even when their effects on mouse behavior were comparable. Further, this approach  
239 allowed us to retrospectively identify the neural correlates of known antipsychotic drug efficacy.

240 Remarkably we found that, despite the longstanding view that antipsychotic drugs work  
241 by normalizing D2R signaling and D2-SPN activity, their clinical efficacy was better explained  
242 by their ability to normalize D1-SPN activity. This observation led us to explore the therapeutic  
243 potential of directly targeting abnormal D1-SPN dynamics. Chemogenetic and directed pharma-  
244 cological experiments combined with  $\text{Ca}^{2+}$  imaging confirmed this potential, which has largely  
245 been overlooked as a target for therapeutic development. In addition, our imaging results pro-  
246 duced other unexpected findings that challenge our understanding of how specific dopamine re-  
247 ceptors modulate intact striatal circuit function. These additional findings also unveiled differ-  
248 ences between each compound with implications for therapeutic development that warrant fur-  
249 ther consideration.

## 250 Hyperdopaminergic striatal ensemble dynamics

251 Our study provides the first detailed analysis of how amphetamine alters the neural ensemble dy-  
252 namics of D1- and D2-SPNs. Amphetamine treatment predictably enhanced D1- and suppressed  
253 D2-SPN activity levels, consistent with earlier studies reporting heterogeneous effects of am-  
254 phetamine on unidentified SPN activity levels<sup>32</sup>. Unexpectedly these effects were dependent on  
255 locomotor state. These state-dependent effects may coincide with earlier reports of dose-depend-  
256 ent amphetamine treatment effects on SPN activity, whereby lower doses increase and higher  
257 doses suppress SPN activity levels<sup>33</sup>. Given the correlations between amphetamine treatment  
258 dose, dopamine transmission levels and locomotor speed, the selective increase in D1-SPN activ-  
259 ity at lower speeds and decrease in D2-SPN activity at higher speeds may reflect differences in  
260 striatal dopamine levels at different locomotor states (**Fig. 1c–e**).

261 Amphetamine treatment also differentially altered the degree of spatially coordinated D1-

262 and D2-SPN co-activity (**Fig. 1f–h**). We previously observed de-correlated D1-SPN hyperactiv-  
263 ity during L-DOPA-induced dyskinesia, which is intriguing given that dyskinesia and disor-  
264 ganized behavior also occur in schizophrenia, even in drug-naïve patients<sup>12, 34</sup>. These observa-  
265 tions suggest that the neural substrates of psychosis and dyskinesia may both result from excess  
266 dopaminergic modulation of intrinsic excitability or synaptic strength in D1-SPNs. By contrast,  
267 D2-SPNs increased their spatiotemporal coordination following amphetamine treatment. This  
268 was a novel signature of striatal network dysfunction that was not observed in our earlier stud-  
269 ies<sup>12</sup>. This heightened co-activation may reflect the diminution of lateral inhibition between D2-  
270 SPN cell pairs, possibly via axon-terminal D2R activation<sup>35</sup>. While this neural ensemble signa-  
271 ture was unique to this study, the fact that neither haloperidol nor clozapine altered proximal D2-  
272 SPN co-activity following amphetamine treatment argues against a causal role of these dynamics  
273 in psychosis.

## 274 The neural ensemble correlates of antipsychotic drug efficacy

275 We tested two efficacious antipsychotic drugs (clozapine and haloperidol) and one inefficacious  
276 drug candidate (MP-10). Under hyperdopaminergic conditions, clozapine only affected D1-  
277 SPNs, haloperidol affected both SPN types, and MP-10 normalized D2- but exacerbated hy-  
278 perdopaminergic D1-SPN dynamics (**Fig. 3e**). Clozapine's superior clinical efficacy and favora-  
279 ble side-effect profile have long been recognized, but incompletely understood. Clozapine is the  
280 prototype of the atypical antipsychotic drugs, which are distinguished by their lower D2 and  
281 higher 5-HT<sub>2</sub> receptor family affinities<sup>36</sup>. This pharmacological profile is thought to permit anti-  
282 psychotic effect with a lower level of D2R engagement, precluding the adverse (*e.g.*, motor) ef-  
283 fects associated with first-generation antipsychotics like haloperidol<sup>37, 38</sup>. In addition, this unique

284 pharmacology is thought to underlie clozapine's superior efficacy for psychosis, including its  
285 treatment-resistant manifestations<sup>39,40</sup>. This complex pharmacology, including the fact that  
286 clozapine binds to D1Rs *in vivo*<sup>41</sup>, made it difficult to predict but less of a surprise that clozapine  
287 only affected hyperdopaminergic D1-SPN dynamics. Likewise, although haloperidol's greater  
288 specificity for D2Rs explains its effects on D2-SPN activity, its normalization of hyperdopamin-  
289 ergic D1-SPN dynamics was also surprising. However, D2 and other brain receptors bound by  
290 haloperidol are located throughout the cortico-basal ganglia-thalamic circuit, including in local  
291 striatal interneurons, which could indirectly contribute to haloperidol's effects on D1-SPN activ-  
292 ity<sup>42-50</sup>.

293         Perhaps even more surprising than clozapine and haloperidol's effects on D1-SPN activ-  
294 ity was the fact that the clinically non-efficacious drug MP-10 completely normalized hyperdo-  
295 paminergic D2-SPN dynamics (**Fig. 3c, d**). At face value, this finding implies that normalizing  
296 D2-SPN activity is not sufficient to produce an antipsychotic effect. However, both D1- and D2-  
297 SPNs express PDE10A, the enzyme inhibited by MP-10<sup>51</sup>. Still, previous reports suggest that  
298 PDE10A inhibition preferentially affects D2-SPNs<sup>52, 53</sup>. Consistent with this idea, MP-10 in-  
299 creased D2-, but not D1-SPN activity levels under normal conditions (**Fig. 2c, d**). However, MP-  
300 10 treatment exacerbated the D1-SPN hyperactivity observed under hyperdopaminergic condi-  
301 tions (**Fig. 3a**). Therefore, one possible explanation for MP-10's lack of antipsychotic effects in  
302 patients is that its effects on D1-SPN activity counteracts any of its therapeutic effects on D2-  
303 SPN dynamics. Future experiments determining whether other effective antipsychotics exclu-  
304 sively act on D2-SPNs under hyperdopaminergic conditions will be necessary to demonstrate  
305 whether solely modulating D2-SPNs is associated with clinical therapeutic effect of D2-SPN

306 modulation. Nevertheless, our current results suggest that normalizing D1-SPN dynamics is suf-  
307 ficient for antipsychotic effect, and that selectively doing so may be optimal.

### 308 Therapeutically targeting hyperdopaminergic D1-SPN dynamics

309 Given the apparent link between normalizing D1-SPN dynamics and antipsychotic effect, we  
310 next asked whether we could selectively target these dynamics therapeutically. Chemogenet-  
311 ically inhibiting D1-SPNs in the DMS was sufficient to normalize amphetamine-driven changes  
312 in locomotion and sensorimotor gating. Likewise, three D1-SPN-targeted compounds all normal-  
313 ized D1-SPN hyperactivity, locomotion, and sensorimotor gating following amphetamine treat-  
314 ment. The first of these compounds was VU0467154, positive allosteric modulator (PAM) of  
315  $G_{i/o}$ -coupled M4 cholinergic receptors, which are expressed in D1-, but not D2-SPNs<sup>31</sup>.  
316 VU0467154 or other M4-PAMs are known to have antipsychotic-like effects on behavior in ani-  
317 mal models related to psychosis<sup>24, 54, 55</sup>. In our neural ensemble readout of drug efficacy,  
318 VU0467154 was the most similar to clozapine, in that it selectively normalized de-correlated D1-  
319 SPN hyperactivity following amphetamine treatment, but had no effect on D2-SPNs (**Fig. 6e**).  
320 The second drug we tested, the D1R partial agonist SKF38393, also only affected hyperdopa-  
321 minergic D1-SPN activity levels, but in contrast to VU0467154 it failed to normalize the spatio-  
322 temporal dynamics of D1-SPN activity. By contrast, the D1R antagonist SCH23390 was most  
323 similar to haloperidol, in that it normalized the hyperdopaminergic dynamics of both D1- and  
324 D2-SPNs.

325 Over the past decade, much of the focus on D1Rs in schizophrenia has been on augment-  
326 ing their signaling to promote cognition<sup>56-59</sup>. This idea is largely based on foundational work  
327 showing that, in schizophrenia, dopamine transmission is decreased within the prefrontal cortex,

328 where D1Rs are enriched and their signaling is crucial for cognitive function<sup>60, 61</sup>. This results in  
329 regional imbalance in dopamine signaling between cortex and striatum that poses a challenge to  
330 therapeutic development for schizophrenia. For example, attenuating dopamine signaling may be  
331 crucial for treating psychosis, but treatments that do so may exacerbate the cognitive symptoms  
332 of schizophrenia. Likewise, augmenting dopamine signaling might improve cognition, but our  
333 results suggest that doing so, particularly at D1Rs, could also worsen the cardinal symptoms of  
334 psychosis.

335         Dopamine stabilizers, such as the partial D2R agonist aripiprazole, are considered to be a  
336 possible solution to this problem, by exerting state-dependent effects on dopamine receptor sig-  
337 naling<sup>62, 63</sup>. Specifically, aripiprazole is thought to act as a D2R agonist under conditions of low  
338 dopamine (*i.e.*, in cortex) and antagonist under high dopamine conditions (*i.e.*, striatum). Given  
339 the importance of cortical D1R signaling for cognition and the association between normal D1-  
340 SPN dynamics and antipsychotic effect uncovered here, we reasoned that a D1R partial agonist  
341 might better stabilize dopamine signaling across cortex and striatum and in different dopaminer-  
342 gic states. Consistent with this idea, SKF38393 exhibited dopamine agonist-like effects on D1-  
343 SPN activity under normal conditions, but suppressed D1-SPN activity following amphetamine  
344 treatment, similar to the D1R antagonist SCH23390 (**Fig. 5c**; **Fig. 6a**).

345         SCH23390 normalized more of the amphetamine-driven changes in D1- and D2-SPN en-  
346 semble dynamics than the other two D1-SPN-targeted drugs, but exerted clear D1R antagonist  
347 effects on D1-SPN activity levels under normal conditions (**Fig. 5c**; **Fig. 6a–c**). Given that an an-  
348 tagonist is predicted to block D1R signaling at both low/normal as well as high dopamine condi-  
349 tions, D1R antagonism may have limited utility for treating regional dopamine dysfunction in



350 schizophrenia. Consistent with this idea, D1R antagonism does not appear to be an effective ther-  
351 apeutic strategy for psychosis<sup>64</sup>. By contrast, modulating M4Rs provides a possible approach to  
352 stabilize D1R signal transduction in the striatum without specifically counteracting D1R signal-  
353 ing under normal or low dopamine conditions. Consistent with this idea, VU0467154 had no ef-  
354 fect on D1- or D2-SPN under normal conditions, but completely normalized D1-SPN dynamics  
355 following amphetamine treatment (**Fig. 5c, d; Fig. 6a, b**). Taken together, our results suggest  
356 that M4 positive allosteric modulation and possibly D1R partial agonism might provide similar  
357 therapeutic effects to clozapine, with the minimal motor side effects and the potential for the re-  
358 gional stabilization of brain dopamine function. Intriguingly, D1R agonism is predicted to im-  
359 prove cognitive function under hypodopaminergic conditions in the cortex, and an M4-PAM has  
360 been shown to have pro-cognitive effects in animal models related to schizophrenia<sup>54</sup>.

### 361 Neural ensemble correlates of adverse drug effects

362 Although we primarily considered efficacy in terms of each drug's effects under hyperdopamin-  
363 ergic conditions, each drug's effects on D1- and D2-SPN ensemble dynamics under normal con-  
364 ditions is another important therapeutic consideration. In schizophrenia patients, fluctuations in  
365 striatal dopamine are thought to drive psychotic episodes, and dopamine transmission is normal  
366 in patients with stable symptoms<sup>65</sup>. Taking this into consideration, the ideal treatment would  
367 minimally affect striatal activity under normal conditions, but block the effects of excess dopa-  
368 mine transmission during psychotic episodes. Of particular relevance to antipsychotic drugs is  
369 their propensity for adverse motor effects, such as parkinsonism. We recently used this approach  
370 to characterize the D1- and D2-SPN ensemble correlates of parkinsonism following the chemical  
371 lesion of dopamine neurons<sup>12</sup>. Specifically, we found that the loss of dopamine decreases D1-

372 and increases D2-SPN activity levels. Among the drugs tested here, clozapine and VU0467154  
373 were the only ones that did not increase D2-SPN activity levels under normal conditions.  
374 SCH23390 additionally reduced D1-SPN activity under normal conditions, suggesting D1R an-  
375 tagonism may have a particularly high propensity for adverse motor effects (**Fig. 3d**; **Fig. 5c, d**).  
376 These parkinsonism-associated dynamics may underlie the different motor side-effect propensi-  
377 ties of drugs like haloperidol and clozapine, and help predict the side-effect propensities of other  
378 candidate treatments.

379 Overall, the neural ensemble approach described here is a powerful tool for understand-  
380 ing the mechanisms underlying brain diseases and their effective treatment. We demonstrated the  
381 utility of this approach for predicting the different efficacies and side-effect propensities of three  
382 antipsychotic drugs. Our results suggest that the optimal therapy for psychosis specifically nor-  
383 malizes D1-SPN dynamics under hyperdopaminergic conditions and minimally perturbs D1- and  
384 D2-SPN activity under normal conditions. We found that normalizing D1-SPN hyperactivity is  
385 sufficient to rescue amphetamine-driven disruption of antipsychotic responsive behaviors, and  
386 we adjudicate three potential therapeutic strategies for targeting aberrant D1-SPN dynamics.  
387 These findings have the potential to inform the development of novel treatments for psychosis  
388 with fewer adverse effects and greater overall efficacy.

## 389 Methods

---

### 390 Mice

391 All mice were housed and handled according to guidelines approved by the Northwestern Uni-  
392 versity Animal Care and Use Committee. We used both male and female mice for all experi-  
393 ments. For Ca<sup>2+</sup> imaging and DREADD experiments, we used GENSAT *Drd1a* (FK150) or  
394 *Adora2a* (KG139) BAC transgenic Cre-driver mouse lines from the Mutant Mouse Research &  
395 Resource Centers ([www.mmrrc.org](http://www.mmrrc.org)), backcrossed to a C57BL/6J background (Jax # 000664).  
396 For PPI experiments with amphetamine + antipsychotic drug treatment, we used C57BL/6J mice.  
397 All mice were 12–24 weeks at the start of experimental testing, with the exception of the mice  
398 used for slice electrophysiology, which were aged 7–8 weeks at the time of testing.

### 399 Virus injections

400 For all surgeries, we anesthetized mice with isoflurane (2% in O<sub>2</sub>) and stereotaxically injected  
401 virus at a rate of 250 nL·min<sup>-1</sup> into the DMS using a microsyringe with a 33-gauge beveled tip  
402 needle. All anterior-posterior (AP) and medial-lateral (ML) coordinates are reported from  
403 bregma, while all dorsal-ventral (DV) coordinates are reported from dura. For all DV coordi-  
404 nates, we went 0.5-mm past the injection target, and then withdrew the syringe back to the target  
405 for the injection. After each injection, we left the syringe in place for five min, withdrew the sy-  
406 ringe 0.1 mm and waited five more min before slowly withdrawing the syringe completely. Fol-  
407 lowing virus injection we sutured the scalp, injected analgesic (Buprenorphine SR; 1 mg·kg<sup>-1</sup>),  
408 and allowed the mice to recover for a week before implanting an optical guide tube.

409 For Ca<sup>2+</sup> imaging experiments, we injected 500 nL of AAV2/9-Syn-FLEX-GCaMP7f  
410 ( $1.6 \times 10^{12}$  GC·mL<sup>-1</sup>; AP: 0.8 mm, ML: 1.5 mm and DV: -2.7 mm). To transduce a wider range

411 DMS neurons for DREADD behavioral experiments, we injected 650 nL of AAV2/9-hSyn-DIO-  
412 hM4Di-mCherry ( $5.0 \times 10^{12}$  GC·mL<sup>-1</sup>) or AAV2/9-hSyn-DIO-mCherry ( $1.15 \times 10^{12}$  GC·mL<sup>-1</sup>)  
413 bilaterally at two sites in each hemisphere (AP: 0.4 mm, ML:  $\pm 1.5$  mm and AP: 1.2 mm, ML:  
414  $\pm 1.25$ , both DV: -2.8 mm). For sparser transduction in our DREADD electrophysiology experi-  
415 ments, we injected 650 nL of AAV2/9-hSyn-DIO-hM4Di-mCherry ( $1.25 \times 10^{12}$  GC·mL<sup>-1</sup>) bilat-  
416 erally at two sites in each hemisphere (AP: 0.4 mm, ML:  $\pm 1.5$  mm and AP: 1.2 mm, ML:  $\pm 1.1$   
417 mm, both DV: -2.5 mm). We obtained all viruses from AddGene.

## 418 Implant surgeries

419 We constructed optical guide tubes by using ultraviolet (UV) liquid adhesive (Norland #81) and  
420 a UV spot curing system (Electro-Lite) to fix a 2-mm-diameter disc of #0 glass (TLC Interna-  
421 tional) to the tip of a 3.8-mm-long, 18-gauge, extra-thin stainless steel tube (Ziggy's Tubes and  
422 Wires). We ground off any excess glass using a polishing wheel (Ultratec).

423 To prepare mice for Ca<sup>2+</sup> imaging, we anesthetized virus-injected mice with isoflurane  
424 (2% in O<sub>2</sub>) and a 1.4-mm-diameter drill bit was used to create a craniotomy (AP: 0.8 mm; ML:  
425 1.5 mm) for implantation of the optical guide tube. We used a 0.5-mm diameter drill bit to drill  
426 four additional small holes at spatially distributed locations for insertion of four anchoring skull  
427 screws (Antrin miniature specialties). We aspirated cortex down to DV: -2.1 mm from dura by  
428 using a 27-gauge blunt-end needle and implanted the optical guide tube at DV: -2.35 mm from  
429 dura. After placing the guide tube, we applied Metabond (C&B Metabond) to the skull, and then  
430 used dental acrylic (Coltene) to fix the full assembly along with a stainless steel head-plate (La-  
431 ser Alliance) for head-fixing mice during attachment and release of the miniature microscope.  
432 We injected analgesic (Buprenorphine SR; 1 mg·kg<sup>-1</sup>) and allowed the mice to recover for 3–4  
433 weeks before mounting the miniature microscope.

#### 434 Miniature microscope mounting

435 We head-fixed each guide-tube implanted mouse by its headplate on a running wheel and in-  
436 serted a gradient refractive index (GRIN) lens (1-mm diameter; 4.12-mm length; 0.46 numerical  
437 aperture; 0.45 pitch; Inscopix Inc.) into the optical guide tube. We then assessed GCaMP7f ex-  
438 pression in the DMS using a commercial two-photon fluorescence microscope (Ultima Investiga-  
439 tor, Bruker). We then anesthetized mice with substantial GCaMP7f expression with isoflurane  
440 (2% in O<sub>2</sub>), placed them back into the stereotaxic frame, and glued the GRIN lens in the guide  
441 tube with UV light curable epoxy (Loctite 4305). Next, we used the stereotaxic manipulator to  
442 lower the miniature microscope with its attached base plate (nVistaHD, Inscopix Inc.) toward the  
443 GRIN lens until the fluorescent tissue came into focus. We then created a structure of blue-light  
444 curable resin (Flow-It ALC; Pentron) on the dental acrylic skull cap around the base plate, then  
445 attached the structure to the miniature microscope base plate using UV curable epoxy (Loctite  
446 4305). Finally, we coated the epoxy/resin with black nail polish to make it opaque.

#### 447 *In vivo* pharmacology

448 We administered all drugs via subcutaneous injection (10 mL·kg<sup>-1</sup> injection volume) on sequen-  
449 tial days at the escalating dosages and order depicted in **Fig. 2a** and **Fig. 5a**. All mice received  
450 one day off between treatments with the different drugs. We dissolved clozapine (2 or 3.2 mg·kg<sup>-1</sup>)  
451 and haloperidol (0.1 or 0.32 mg·kg<sup>-1</sup>) in 0.3% tartaric acid. We dissolved SCH23390 (0.032 or  
452 0.1 mg·kg<sup>-1</sup>) and D-Amphetamine hemisulfate (2.5 or 10 mg·kg<sup>-1</sup>) in saline (0.9% NaCl). We  
453 dissolved MP-10 (1 or 3.2 mg·kg<sup>-1</sup>) in 5% 2-Hydroxypropyl-β-cyclodextrin in saline,  
454 VU0467154 (1 or 10 mg·kg<sup>-1</sup>) in 10% Tween 80, SKF38393 (10 or 100 mg·kg<sup>-1</sup>) in water, and  
455 DCZ (10 μg·kg<sup>-1</sup>) in 2% DMSO. We obtained VU0467154 from the Vanderbilt Center for Neu-  
456 roscience and Drug Discovery, DCZ from MedChemExpress, and all other drugs from Sigma.

457 To examine the effects of vehicle or antipsychotic drugs under normal and hyperdopa-  
458 minergic states, we injected each drug or its corresponding vehicle and waited 10 min before re-  
459 cording open field behavior +  $\text{Ca}^{2+}$  activity for 15 min. We then injected amphetamine (2.5  
460  $\text{mg}\cdot\text{kg}^{-1}$ ) and waited 10 min before recording behavior +  $\text{Ca}^{2+}$  activity for 45 min (**Fig. 2a** and  
461 **Fig. 5a**). For PPI experiments, we administered the higher of the two doses of each drug or their  
462 corresponding vehicle 25 min before amphetamine injection (10  $\text{mg}\cdot\text{kg}^{-1}$ ) and measured PPI 25  
463 min after amphetamine treatment (**Fig. 3f** and **Fig. 6f**). For chemogenetic experiments in the  
464 open field, we administered DCZ or its vehicle 10 min before recording behavior for 15 min,  
465 then administered amphetamine (2.5  $\text{mg}\cdot\text{kg}^{-1}$ ) and waited 10 min before recording behavior for  
466 45 min. For chemogenetic experiments during PPI, we administered DCZ 25 min before amphet-  
467 amine injection (10  $\text{mg}\cdot\text{kg}^{-1}$ ) and measured PPI 25 min after amphetamine treatment.

#### 468 *In vivo* $\text{Ca}^{2+}$ imaging

469 We habituated mice to a circular open field arena (30.48-cm diameter) for three days (1 h per  
470 day), during which time we also habituated the mice to two subcutaneous injections of saline and  
471 one injection of amphetamine (2.5  $\text{mg}\cdot\text{kg}^{-1}$ ). Just before each  $\text{Ca}^{2+}$  imaging session, we briefly  
472 head fixed the mouse by its implanted head plate on a running wheel. We then attached the min-  
473 iature microscope, adjusted its focal plane, and then released the mouse after securing the micro-  
474 scope. After 20 min habituation in the open field, we injected mice with vehicle or drug, waited  
475 10 min and recorded  $\text{Ca}^{2+}$  activity for 15 min, then injected amphetamine, waited 10 min, and  
476 recorded  $\text{Ca}^{2+}$  activity for 45 min as described in **Pharmacology** (**Fig. 2a** and **Fig. 5a**). We used  
477 an illumination power of 50–200  $\mu\text{W}$  at the specimen plane and a 20-Hz image frame-acquisition  
478 rate.

479 **PPI.** We placed mice into a plexiglass cylinder (10 × 20 × 10 cm) on a platform equipped with a

480 piezoelectric transducer inside of a larger, sound-attenuating chamber with 65 dB of continuous  
481 background noise (SR-Lab; San Diego Instruments). Mice received 2 × 30 min habituation ses-  
482 sions on two consecutive days. During experimental testing, we treated mice with vehicle, drug,  
483 or DCZ + amphetamine (as described in **Pharmacology**) and placed them into the startle cham-  
484 ber. Evaluation of PPI consisted of 5 min acclimation followed by five priming acoustic stimulus  
485 pulses (120 dB; 40 ms) then 20 trial blocks of pseudo-randomly presented trials of no-stimulus  
486 pulse or pre-pulse (0, 4, 8, or 16 dB above background; 20 ms) 100 ms before the acoustic startle  
487 stimulus (120 dB; 40 ms) (**Fig. 3f** and **Fig. 6f**). The intertrial interval (ITI) averaged 17 s (range  
488 10–25 s). We calculated the levels of PPI at each pre-pulse intensity as  $100 - [100 \times (\text{response}$   
489  $\text{amplitude for each pre-pulse stimulus with startle stimulus}) / (\text{response amplitude for 0 dB pre-}$   
490  $\text{pulse with startle stimulus})]$ . Mean % PPI was calculated by averaging levels of PPI at each pre-  
491 pulse intensity level.

## 492 Histology

493 After all behavioral,  $\text{Ca}^{2+}$  imaging, and PPI experiments, we euthanized and intracardially per-  
494 fused the mice with phosphate buffered saline (PBS) and then a 4% solution of paraformalde-  
495 hyde in PBS. We sliced 80- $\mu\text{M}$ -thick coronal sections from the fixed-brain tissue using a vi-  
496 bratome (Leica VT1000s). For immunostaining, we used an anti-GFP antibody (1:1000, Invitro-  
497 gen, A11122) and a fluorophore-conjugated secondary antibody (1:500, Jackson Immu-  
498 noresearch 711-546-152), then mounted the sections with DAPI-containing fluoromount (South-  
499 ernBiotech, 0100-20). We imaged slices using a fluorescent microscope (Keyence BZ-X800)  
500 with a 10x objective.

## 501 Slice electrophysiology

502 We anesthetized and transcardially perfused mice with ice-cold, carbogen-saturated cutting solu-  
503 tion (185 mM sucrose, 2.5 mM KCl, 25 mM NaHCO<sub>3</sub>, 1.25 mM NaH<sub>2</sub>PO<sub>4</sub>, 0.5 mM CaCl<sub>2</sub>, 10  
504 mM MgCl<sub>2</sub>, and 25 mM glucose, pH 7.3 [315–320 mOsm·L<sup>-1</sup>]). Following perfusion, we decapi-  
505 tated the mice, rapidly removed the brain and sectioned it in an ice-cold carbogen-saturated cut-  
506 ting solution using a vibratome (VT1000S, Leica Microsystems). We then incubated coronal  
507 slices (220 μm) in carbogen-saturated artificial cerebrospinal fluid (ACSF) containing 93 mM  
508 NMDG, 93 mM HCl, 2.5 mM KCl, 30 mM NaHCO<sub>3</sub>, 1.2 mM NaH<sub>2</sub>PO<sub>4</sub>, 20 mM HEPES, 5 mM  
509 Na-ascorbate, 3 mM Na-pyruvate, 2 mM thiourea, 0.5 mM CaCl<sub>2</sub>, 10 mM MgSO<sub>4</sub>, and 25 mM  
510 glucose, pH 7.3 (315–320 mOsm·L<sup>-1</sup>) at 32–34°C for 10 min, then in carbogen-saturated ACSF  
511 containing 125 mM NaCl, 2.5 mM KCl, 25 mM NaHCO<sub>3</sub>, 1.25 mM NaH<sub>2</sub>PO<sub>4</sub>, 2 mM CaCl<sub>2</sub>, 1  
512 mM MgCl<sub>2</sub>, and 25 mM glucose, pH 7.3 (315–320 mOsm L<sup>-1</sup>) at room temperature for at least 1  
513 hr before electrophysiological recordings. We transferred the brain slices to a small-volume (<  
514 0.5 ml) recording chamber mounted on a fixed-stage, upright microscope. We performed all  
515 electrophysiological recordings at 32–34°C. The chamber was superfused with carbogen-satu-  
516 rated ACSF (SH-27B with TC-324B controller, Warner Instruments). We performed conven-  
517 tional whole-cell patch-clamp recordings on visually identified (60 X, 0.9 NA water-immersion  
518 objective) D1-SPNs expressing mCherry. Recording electrodes had tip resistances of 3–8 MΩ  
519 when filled with internal recording solution containing (in mM): 125 KMeSO<sub>4</sub>, 5 KCl, 5 NaCl,  
520 0.02 EGTA, 11 HEPES, 1 MgCl, 10 phosphocreatine-Na<sub>2</sub>, 4 Mg-ATP, 0.3 Na-GTP, adjusted to  
521 pH 7.2, 300 mOsm·L<sup>-1</sup>. We made all recordings using MultiClamp 700B amplifiers and filtered  
522 all signals at 2 kHz and digitized at 10 kHz. We discarded data if the input resistance changed  
523 >20% over the time course of the experiment. For drug treatment, we perfused vehicle (0.2%  
524 DMSO), DCZ (100 nM or 1 μM) or 10 μM of clozapine-N-oxide (CNO) for 1 mL·min<sup>-1</sup>.



## 525 Behavioral tracking

526 We used a TTL-triggered video camera with IC Capture 2.4 software (The Imaging Source) with  
527 a varifocal lens (T3Z2910CS; Computar) to record 20-Hz videos of freely moving mouse behav-  
528 ior. We used software written in ImageJ and part of the CIAtah analysis suite ([https://ba-  
529 hanonu.github.io/ciatah/](https://bahanonu.github.io/ciatah/)) to track each mouse's position in an open field arena. Briefly, we used  
530 this software to identify the mean location of the largest, and darkest contiguous pixel group (*i.e.*,  
531 the mouse) in each movie frame, then computed the mouse's locomotor speed from the trajectory  
532 of its centroid location across movie frames. We then applied a 1-s median filter to the resulting  
533 speed trace and down-sampled the trace by a factor of 4 to match the temporal resolution of our  
534 5-Hz  $\text{Ca}^{2+}$  recordings. We classified each 5-Hz time bin of the speed trace as one in which the  
535 mouse was either 'resting' or 'moving', according to whether its instantaneous speed was below  
536 or above  $0.5 \text{ cm}\cdot\text{s}^{-1}$ , respectively. If the mouse was 'moving' in two time bins separated by  $<1 \text{ s}$ ,  
537 we classified the intervening time bins as ones in which the mouse was 'moving'.

## 538 $\text{Ca}^{2+}$ movie pre-processing

539 We used the CIAtah analysis suite to 1) down-sample the acquired  $\text{Ca}^{2+}$  movies in space using  $2$   
540  $\times 2$  bi-linear interpolation, 2) reduce background fluorescence by applying a Gaussian low-pass  
541 spatial filter to each movie frame and dividing each frame by its low-pass filtered version, 3) mo-  
542 tion correct using the TurboReg algorithm, 4) normalize each movie by subtracting the mean flu-  
543 orescence value for each pixel in time and dividing each pixel by the same mean fluorescence  
544  $[(F(t) - F_0)/F_0]$ , and 5) temporally down-sample the resulting  $\Delta F/F$  movies by a factor of 4 using  
545 linear interpolation to a frame rate of 5 Hz.

## 546 Active neuron identification

547 We used Constrained Nonnegative Matrix Factorization for microendoscopic data (CNMF-E)<sup>66</sup>  
548 to extract putative neurons from the processed  $\Delta F/F$  movies. We then visually inspected and  
549 manually classified candidate cells in 12% of the  $\text{Ca}^{2+}$  imaging sessions (42 of 361 total imaging  
550 sessions) based on their size, shape, and  $\text{Ca}^{2+}$  activity trace. We then used these manually sorted  
551 data to train a machine-learning based classifier (using the CLEAN module in CIAtah) for auto-  
552 mated sorting of the entire data set. This automated classifier categorized candidate cells based  
553 on the evaluation of 21 features of the CNMF-E spatial filters, their  $\text{Ca}^{2+}$  activity traces, and the  
554  $\Delta F/F$  movies. Parameters included: the 1) diameter 2) area and 3) perimeter of the cellular filter;  
555 (4) proportion of the pixels in the convex hull that were also in the spatial filter; the (5) skewness  
556 and (6) kurtosis of the statistical distribution of intensity values in the spatial filter; (7) mean  
557 value of the signal-to-noise ratio (SNR), averaged over all  $\text{Ca}^{2+}$  transients within the candidate  
558 cell; number of  $\text{Ca}^{2+}$  transients greater than (8) 1, (9) 3, and (10) 5 times the s.d. of the noise fluctu-  
559 ations within the candidate cells; (11) mean ratio of the peak rise and decay slopes of the  $\text{Ca}^{2+}$   
560 transients; (12) mean full-width half max value of the  $\text{Ca}^{2+}$  transients; (13) mean amplitude of the  
561  $\text{Ca}^{2+}$  transients; the (14) skewness and (15) kurtosis of the statistical distribution of intensity val-  
562 ues of the full  $\text{Ca}^{2+}$  activity trace for each candidate cell; (16) mean amplitude variance at each  
563 time point in a 16-s-window around each  $\text{Ca}^{2+}$  transient waveform; (17) mean correlation coeffi-  
564 cient of all  $\text{Ca}^{2+}$  transient waveforms; (18) the mean correlation coefficient between the CNMF-E  
565 image and, at most, 10 images taken from frames temporally aligned to  $\text{Ca}^{2+}$  event transients in  
566 the movie and cropped to a  $20 \times 20$  pixel region centered on the CNMF-E image centroid; (19)  
567 the same as (18) but using a binarized image (all pixels below 40% of the maximum value set to  
568 zero, all above set to one); (20) the same as (18) but using only the maximum correlation coeffi-  
569 cient from all CNMF-E-movie frame image comparisons; and (21) the same as (19) but using

570 only the maximum correlation coefficient from all CNMF-E movie frame image comparisons.  
571 After computing these parameters for every candidate cell identified by CNMF-E, we used  
572 MATLAB's *Statistics and Machine Learning* and *Deep Learning* software toolboxes to train  
573 support vector machine (SVM), general linear model (GLM), and neural network (nnet) classifi-  
574 ers to automatically classify neurons in our data set.

### 575 $\text{Ca}^{2+}$ event detection

576 After extracting all individual cells and their time traces of  $\text{Ca}^{2+}$  activity, we evaluated the indi-  
577 vidual  $\text{Ca}^{2+}$  events in each cell's time trace using a threshold-crossing algorithm<sup>67</sup>. Noise and re-  
578 duced fluctuations in baseline fluorescence were removed by averaging over a 600 ms (3 frame)  
579 sliding window, then subtracting a median-filtered version (40 s sliding window) of the trace  
580 from the smoothed version. We calculated the standard deviation (s.d.) of the resulting trace and  
581 identified any peaks that were  $\geq 2.5$  s.d. above baseline noise while enforcing a minimum inter-  
582 event time of  $> 1.6$  s. We determined the initiation time of each  $\text{Ca}^{2+}$  event as the temporal mid-  
583 point between the time of each event's fluorescence peak and the most recent preceding trough  
584 in fluorescence. All subsequent data analyses of neural activity used the resulting 5-Hz binarized  
585 event trains in which a '1' indicated the initiation of a  $\text{Ca}^{2+}$  event. To generate the illustrative  
586  $\text{Ca}^{2+}$  activity traces in **Fig. 1b**, for each example cell we set to zero all pixels of the cell's spatial  
587 filter with weights  $< 50\%$  of the maximum value in the filter, and then applied the truncated filter  
588 to the  $\Delta F/F$  movie to generate a  $\text{Ca}^{2+}$  activity trace.

### 589 Analysis of pairwise cell co-activity

590 To identify correlated  $\text{Ca}^{2+}$  activity within each frame, we evaluated the fraction of all  $\text{Ca}^{2+}$   
591 events in the two cells in each frame. This fraction is equivalent to a Jaccard index,  $J$ , of the two

592 cells' correlated activity ( $J = |T_1 \cap T_2| / |T_1 \cup T_2|$ ), where  $T_1$  and  $T_2$  are the binarized rasters of  
593  $Ca^{2+}$  events for the two cells<sup>12</sup>. We plotted for all cell pairs the Jaccard index as a function of an-  
594 atomical separation between the two cells' centroids. To control for any effects of time-varying  
595  $Ca^{2+}$  event rates on the Jaccard indices, we also computed the Jaccard indices for datasets in  
596 which the binarized  $Ca^{2+}$  event trace for each cell was circularly permuted in time by a randomly  
597 chosen temporal displacement. We did this for 1000 different randomly permuted datasets. We  
598 then normalized the Jaccard index values in the real data by those obtained from the shuffled da-  
599 taset. We defined 'proximal cell co-activity' as the mean Jaccard index for cell pairs within 25–  
600 125  $\mu\text{m}$ , normalized by the corresponding value of the shuffled datasets (**Extended Data Fig.**  
601 **1c**). To examine the relationship between proximal cell co-activity and locomotor speed, we sub-  
602 divided the shuffle-normalized proximal jaccard indices into bins corresponding to locomotor  
603 speeds ranging from 0.5–14  $\text{cm}\cdot\text{s}^{-1}$ . The bin sizes ranged from 0.5  $\text{cm}\cdot\text{s}^{-1}$  bins at lowest speeds to  
604 6  $\text{cm}\cdot\text{s}^{-1}$  bins at highest speeds, for which the statistical sampling was sparse (**Fig. 1f; Extended**  
605 **Data Fig. 1d**). To compare drug effects to vehicle, we normalized the values in each speed bin to  
606 the corresponding values following vehicle or vehicle + amphetamine treatment, then averaged  
607 the speed bins during periods of rest and movement (locomotor speeds  $< 0.5 \text{ cm}\cdot\text{s}^{-1}$  and  $\geq 0.5$   
608  $\text{cm}\cdot\text{s}^{-1}$ , respectively; **Fig. 1h; Fig. 3b, d; Fig. 6b, d; Extended Data Fig. 3a–d**).

## 609 Analysis of event rates

610 We used the binarized  $Ca^{2+}$  event traces of each cell's activity to compute each cell's  $Ca^{2+}$  event  
611 rate as a function of locomotor speed using the same speed bins described above (**Fig. 1c; Ex-**  
612 **tended Data Fig. 1b**). As with the proximal cell co-activity, we normalized the values in each  
613 speed bin to the corresponding values following vehicle or vehicle + amphetamine treatment,  
614 then averaged the speed bins during periods of rest and movement (**Fig. 1e; Fig. 2c, d; Fig. 3a, c;**

615 **Fig. 5c, d; Fig. 6a, c).**

616 **Data analysis and statistical tests**

617 We performed data analysis using custom software written in MATLAB and ImageJ. We used  
618 Prism (GraphPad) to perform statistical tests. We used two-tailed, non-parametric statistical tests  
619 to avoid assumptions of normal distributions and equal variance across groups. For paired tests,  
620 we used Wilcoxon signed-rank tests or one-way repeated measures ANOVA. For drug  $\times$  dose  
621 comparisons, we used two-way repeated measures ANOVA. In some cases, individual doses  
622 were missing due to errors in the recording on those days. In those cases, we used a mixed ef-  
623 fects model to evaluate drug  $\times$  dose comparisons. For post hoc tests, we used a Holm-Sidak cor-  
624 rection for multiple comparisons. *P*- and *N*-values for the statistical tests are provided in **Supple-**  
625 **mentary Table 1.**

626 **Data availability**

---

627 The software code used to process our Ca<sup>2+</sup> movies are freely available ([https://ba-](https://bahanonu.github.io/ciatah/)  
628 [hanonu.github.io/ciatah/](https://bahanonu.github.io/ciatah/)). The data and any custom scripts that support our findings are available  
629 upon request to the corresponding author.

630 **Acknowledgements**

---

631 We thank Dr. Biafra Ahanonu for his assistance in data processing and Dr. P. Jeffrey Conn for  
632 providing VU0467154.

633 **Author information**

---

634 **Affiliations**

635 **Department of Neuroscience, Northwestern University, Chicago IL 60611**

636 Seongsik Yun, Ben Yang, Madison M. Martin, Nai-Hsing Yeh, Anis Contractor, & Jones G. Par-  
637 ker

## 638 Contributions

639 S.Y. performed all imaging, behavior experiments, and histological experiments. B.Y. performed  
640 surgeries and assisted with imaging experiments. M.M.M. performed mouse surgeries and over-  
641 saw mouse breeding. N-H.Y. & A.C. conducted electrophysiology experiments. S.Y. and J.G.P.  
642 designed all experiments, performed all data analysis, and wrote the manuscript with input from  
643 the co-authors.

## 644 Corresponding author

645 Correspondence to Jones G. Parker ([jones.parker@northwestern.edu](mailto:jones.parker@northwestern.edu))

## 646 Ethics declarations

---

647 The authors declare no competing interests.

648

## 649 References

---

- 650 1. Snyder, S.H., Banerjee, S.P., Yamamura, H.I. & Greenberg, D. Drugs, neurotransmitters, and  
651 schizophrenia. *Science* **184**, 1243-1253 (1974).
- 652 2. Carlsson, A. & Lindqvist, M. EFFECT OF CHLORPROMAZINE OR HALOPERIDOL ON FORMATION  
653 OF 3METHOXYTYRAMINE AND NORMETANEPHRINE IN MOUSE BRAIN. *Acta Pharmacol. Toxicol.*  
654 (*Copenh.*) **20**, 140-144 (1963).
- 655 3. Creese, I., Burt, D.R. & Snyder, S.H. Dopamine receptor binding predicts clinical and  
656 pharmacological potencies of antischizophrenic drugs. *Science* **192**, 481-483 (1976).
- 657 4. Matthyse, S. Dopamine and the pharmacology of schizophrenia: the state of the evidence. *J.*  
658 *Psychiatr. Res.* **11**, 107-113 (1974).
- 659 5. Meltzer, H.Y., Matsubara, S. & Lee, J.C. Classification of typical and atypical antipsychotic drugs  
660 on the basis of dopamine D-1, D-2 and serotonin<sub>2</sub> pKi values. *J Pharmacol Exp Ther* **251**, 238-246 (1989).
- 661 6. Kramer, M.S., Last, B., Getson, A. & Reines, S.A. The effects of a selective D4 dopamine receptor  
662 antagonist (L-745,870) in acutely psychotic inpatients with schizophrenia. D4 Dopamine Antagonist  
663 Group. *Arch. Gen. Psychiatry* **54**, 567-572 (1997).

- 664 7. Davies, M.A., Sheffler, D.J. & Roth, B.L. Aripiprazole: a novel atypical antipsychotic drug with a  
665 uniquely robust pharmacology. *CNS drug reviews* **10**, 317-336 (2004).
- 666 8. Allen, J.A., et al. Discovery of beta-arrestin-biased dopamine D2 ligands for probing signal  
667 transduction pathways essential for antipsychotic efficacy. *Proc. Natl. Acad. Sci. U. S. A.* **108**, 18488-  
668 18493 (2011).
- 669 9. Menniti, F.S., Chappie, T.A. & Schmidt, C.J. PDE10A Inhibitors-Clinical Failure or Window Into  
670 Antipsychotic Drug Action? *Front. Neurosci.* **14**, 600178 (2020).
- 671 10. McCutcheon, R.A., Abi-Dargham, A. & Howes, O.D. Schizophrenia, Dopamine and the Striatum:  
672 From Biology to Symptoms. *Trends Neurosci.* **42**, 205-220 (2019).
- 673 11. Missale, C., Nash, S.R., Robinson, S.W., Jaber, M. & Caron, M.G. Dopamine receptors: from  
674 structure to function. *Physiol Rev* **78**, 189-225 (1998).
- 675 12. Parker, J.G., et al. Diametric neural ensemble dynamics in parkinsonian and dyskinetic states.  
676 *Nature* **557**, 177-182 (2018).
- 677 13. Klaus, A., et al. The Spatiotemporal Organization of the Striatum Encodes Action Space. *Neuron*  
678 **96**, 949 (2017).
- 679 14. Albin, R.L., Young, A.B. & Penney, J.B. The functional anatomy of basal ganglia disorders. *Trends*  
680 *Neurosci.* **12**, 366-375 (1989).
- 681 15. DeLong, M.R. Primate models of movement disorders of basal ganglia origin. *Trends Neurosci.*  
682 **13**, 281-285 (1990).
- 683 16. Jenner, P. Molecular mechanisms of L-DOPA-induced dyskinesia. *Nat. Rev. Neurosci.* **9**, 665-677  
684 (2008).
- 685 17. Lobo, M.K., et al. Cell Type-Specific Loss of BDNF Signaling Mimics Optogenetic Control of  
686 Cocaine Reward. *Science* **330**, 385-390 (2010).
- 687 18. Schwartz, N., et al. Chronic pain. Decreased motivation during chronic pain requires long-term  
688 depression in the nucleus accumbens. *Science* **345**, 535-542 (2014).
- 689 19. Francis, T.C., et al. Nucleus accumbens medium spiny neuron subtypes mediate depression-  
690 related outcomes to social defeat stress. *Biol. Psychiatry* **77**, 212-222 (2015).
- 691 20. Moore, H., West, A.R. & Grace, A.A. The regulation of forebrain dopamine transmission:  
692 relevance to the pathophysiology and psychopathology of schizophrenia. *Biol. Psychiatry* **46**, 40-55.
- 693 21. Huhn, M., et al. Comparative efficacy and tolerability of 32 oral antipsychotics for the acute  
694 treatment of adults with multi-episode schizophrenia: a systematic review and network meta-analysis.  
695 *The Lancet* **394**, 939-951 (2019).
- 696 22. Roth, B.L., Sheffler, D.J. & Kroeze, W.K. Magic shotguns versus magic bullets: selectively non-  
697 selective drugs for mood disorders and schizophrenia. *Nat. Rev. Drug Discov.* **3**, 353-359 (2004).
- 698 23. Schmidt, C.J., et al. Preclinical Characterization of Selective Phosphodiesterase 10A Inhibitors: A  
699 New Therapeutic Approach to the Treatment of Schizophrenia. *Journal of Pharmacology and*  
700 *Experimental Therapeutics* **325**, 681-690 (2008).
- 701 24. Foster, D.J., et al. Antipsychotic-like Effects of M4 Positive Allosteric Modulators Are Mediated  
702 by CB2 Receptor-Dependent Inhibition of Dopamine Release. *Neuron* **91**, 1244-1252 (2016).
- 703 25. Kahlig, K.M., et al. Amphetamine induces dopamine efflux through a dopamine transporter  
704 channel. *Proc. Natl. Acad. Sci. U. S. A.* **102**, 3495-3500 (2005).
- 705 26. DeMartinis, N., 3rd, et al. A Proof-of-Concept Study Evaluating the Phosphodiesterase 10A  
706 Inhibitor PF-02545920 in the Adjunctive Treatment of Suboptimally Controlled Symptoms of  
707 Schizophrenia. *J. Clin. Psychopharmacol.* **39**, 318-328 (2019).
- 708 27. Menniti, F.S., Chappie, T.A. & Schmidt, C.J. PDE10A Inhibitors—Clinical Failure or Window Into  
709 Antipsychotic Drug Action? *Front. Neurosci.* **14** (2021).



- 710 28. Geyer, M.A., Krebs-Thomson, K., Braff, D.L. & Swerdlow, N.R. Pharmacological studies of  
711 prepulse inhibition models of sensorimotor gating deficits in schizophrenia: a decade in review.  
712 *Psychopharmacology (Berl.)* **156**, 117-154 (2001).
- 713 29. Roth, B.L. DREADDs for Neuroscientists. *Neuron* **89**, 683-694 (2016).
- 714 30. Nagai, Y., et al. Deschloroclozapine, a potent and selective chemogenetic actuator enables rapid  
715 neuronal and behavioral modulations in mice and monkeys. *Nat. Neurosci.* **23**, 1157-1167 (2020).
- 716 31. Ince, E., Ciliax, B.J. & Levey, A.I. Differential expression of D1 and D2 dopamine and m4  
717 muscarinic acetylcholine receptor proteins in identified striatonigral neurons. *Synapse* **27**, 357-366  
718 (1997).
- 719 32. Wiltchko, A.B., Pettibone, J.R. & Berke, J.D. Opposite effects of stimulant and antipsychotic  
720 drugs on striatal fast-spiking interneurons. *Neuropsychopharmacology* **35**, 1261-1270 (2010).
- 721 33. Rebec, G.V., White, I.M. & Puotz, J.K. Responses of neurons in dorsal striatum during  
722 amphetamine-induced focused stereotypy. *Psychopharmacology (Berl.)* **130**, 343-351 (1997).
- 723 34. Fenton, W.S. Prevalence of spontaneous dyskinesia in schizophrenia. *J. Clin. Psychiatry* **61 Suppl**  
724 **4**, 10-14 (2000).
- 725 35. Dobbs, L.K., et al. Dopamine Regulation of Lateral Inhibition between Striatal Neurons Gates the  
726 Stimulant Actions of Cocaine. *Neuron* **90**, 1100-1113 (2016).
- 727 36. Meltzer, H.Y. Update on typical and atypical antipsychotic drugs. *Annu. Rev. Med.* **64**, 393-406  
728 (2013).
- 729 37. Kapur, S., Zipursky, R., Jones, C., Remington, G. & Houle, S. Relationship between dopamine D(2)  
730 occupancy, clinical response, and side effects: a double-blind PET study of first-episode schizophrenia.  
731 *Am. J. Psychiatry* **157**, 514-520 (2000).
- 732 38. Kapur, S., Zipursky, R.B. & Remington, G. Clinical and theoretical implications of 5-HT<sub>2</sub> and D<sub>2</sub>  
733 receptor occupancy of clozapine, risperidone, and olanzapine in schizophrenia. *Am. J. Psychiatry* **156**,  
734 286-293 (1999).
- 735 39. Kane, J., Honigfeld, G., Singer, J. & Meltzer, H. Clozapine for the treatment-resistant  
736 schizophrenic. A double-blind comparison with chlorpromazine. *Arch. Gen. Psychiatry* **45**, 789-796  
737 (1988).
- 738 40. Hagger, C., et al. Improvement in cognitive functions and psychiatric symptoms in treatment-  
739 refractory schizophrenic patients receiving clozapine. *Biol. Psychiatry* **34**, 702-712 (1993).
- 740 41. Tauscher, J., et al. Equivalent occupancy of dopamine D1 and D2 receptors with clozapine:  
741 differentiation from other atypical antipsychotics. *Am. J. Psychiatry* **161**, 1620-1625 (2004).
- 742 42. Li, P., Snyder, G.L. & Vanover, K.E. Dopamine Targeting Drugs for the Treatment of  
743 Schizophrenia: Past, Present and Future. *Curr. Top. Med. Chem.* **16**, 3385-3403 (2016).
- 744 43. Yan, Z., Song, W.J. & Surmeier, J. D2 dopamine receptors reduce N-type Ca<sup>2+</sup> currents in rat  
745 neostriatal cholinergic interneurons through a membrane-delimited, protein-kinase-C-insensitive  
746 pathway. *J. Neurophysiol.* **77**, 1003-1015 (1997).
- 747 44. Straub, C., Tritsch, N.X., Hagan, N.A., Gu, C. & Sabatini, B.L. Multiphasic modulation of  
748 cholinergic interneurons by nigrostriatal afferents. *J Neurosci* **34**, 8557-8569 (2014).
- 749 45. Centonze, D., et al. Receptor subtypes involved in the presynaptic and postsynaptic actions of  
750 dopamine on striatal interneurons. *J Neurosci* **23**, 6245-6254 (2003).
- 751 46. Lacey, M.G., Mercuri, N.B. & North, R.A. Dopamine acts on D2 receptors to increase potassium  
752 conductance in neurones of the rat substantia nigra zona compacta. *J. Physiol.* **392**, 397-416 (1987).
- 753 47. Bamford, N.S., et al. Heterosynaptic dopamine neurotransmission selects sets of corticostriatal  
754 terminals. *Neuron* **42**, 653-663 (2004).
- 755 48. Hersch, S.M., et al. Electron microscopic analysis of D1 and D2 dopamine receptor proteins in  
756 the dorsal striatum and their synaptic relationships with motor corticostriatal afferents. *J Neurosci* **15**,  
757 5222-5237 (1995).



- 758 49. Bevan, M.D., Booth Pa Fau - Eaton, S.A., Eaton Sa Fau - Bolam, J.P. & Bolam, J.P. Selective  
759 innervation of neostriatal interneurons by a subclass of neuron in the globus pallidus of the rat. (1998).  
760 50. Hoover, B.R. & Marshall, J.F. Molecular, chemical, and anatomical characterization of globus  
761 pallidus dopamine D2 receptor mRNA-containing neurons. *Synapse* **52**, 100-113 (2004).  
762 51. Seeger, T.F., et al. Immunohistochemical localization of PDE10A in the rat brain. *Brain Res.* **985**,  
763 113-126 (2003).  
764 52. Polito, M., et al. Selective Effects of PDE10A Inhibitors on Striatopallidal Neurons Require  
765 Phosphatase Inhibition by DARPP-32. *eNeuro* **2** (2015).  
766 53. Wilson, J.M., et al. Phosphodiesterase 10A inhibitor, MP-10 (PF-2545920), produces greater  
767 induction of c-Fos in dopamine D2 neurons than in D1 neurons in the neostriatum. *Neuropharmacology*  
768 **99**, 379-386 (2015).  
769 54. Bubser, M., et al. Selective activation of M4 muscarinic acetylcholine receptors reverses MK-  
770 801-induced behavioral impairments and enhances associative learning in rodents. *ACS Chem Neurosci*  
771 **5**, 920-942 (2014).  
772 55. Byun, N.E., et al. Antipsychotic drug-like effects of the selective M4 muscarinic acetylcholine  
773 receptor positive allosteric modulator VU0152100. *Neuropsychopharmacology* **39**, 1578-1593 (2014).  
774 56. Arnsten, A.F., Girgis, R.R., Gray, D.L. & Mailman, R.B. Novel Dopamine Therapeutics for Cognitive  
775 Deficits in Schizophrenia. *Biol. Psychiatry* **81**, 67-77 (2017).  
776 57. Kozak, R., et al. Characterization of PF-6142, a Novel, Non-Catecholamine Dopamine Receptor  
777 D1 Agonist, in Murine and Nonhuman Primate Models of Dopaminergic Activation. *Front. Pharmacol.*  
778 **11**, 1005 (2020).  
779 58. Svensson, K.A., Hao, J. & Bruns, R.F. Positive allosteric modulators of the dopamine D1 receptor:  
780 A new mechanism for the treatment of neuropsychiatric disorders. *Adv. Pharmacol.* **86**, 273-305 (2019).  
781 59. Desai, A., et al. Phase 1 randomized study on the safety, tolerability, and pharmacodynamic  
782 cognitive and electrophysiological effects of a dopamine D1 receptor positive allosteric modulator in  
783 patients with schizophrenia. *Neuropsychopharmacology* **46**, 1145-1151 (2021).  
784 60. Williams, G.V. & Goldman-Rakic, P.S. Modulation of memory fields by dopamine D1 receptors in  
785 prefrontal cortex. *Nature* **376**, 572-575 (1995).  
786 61. Weinstein, J.J., et al. Pathway-Specific Dopamine Abnormalities in Schizophrenia. *Biol. Psychiatry*  
787 **81**, 31-42 (2017).  
788 62. Stahl, S.M. Dopamine system stabilizers, aripiprazole, and the next generation of antipsychotics,  
789 part 1, "Goldilocks" actions at dopamine receptors. *J. Clin. Psychiatry* **62**, 841-842 (2001).  
790 63. Lieberman, J.A. Dopamine partial agonists: a new class of antipsychotic. *CNS Drugs* **18**, 251-267  
791 (2004).  
792 64. Karlsson, P., et al. Lack of apparent antipsychotic effect of the D1-dopamine receptor antagonist  
793 SCH39166 in acutely ill schizophrenic patients. *Psychopharmacology (Berl.)* **121**, 309-316 (1995).  
794 65. Laruelle, M. & Abi-Dargham, A. Dopamine as the wind of the psychotic fire: new evidence from  
795 brain imaging studies. *Journal of psychopharmacology (Oxford, England)* **13**, 358-371 (1999).  
796 66. Zhou, P., et al. Efficient and accurate extraction of in vivo calcium signals from microendoscopic  
797 video data. *eLife* **7**, e28728 (2018).  
798 67. Corder, G., et al. An amygdalar neural ensemble that encodes the unpleasantness of pain.  
799 *Science* **363**, 276-281 (2019).

800

801 **Figure 1**

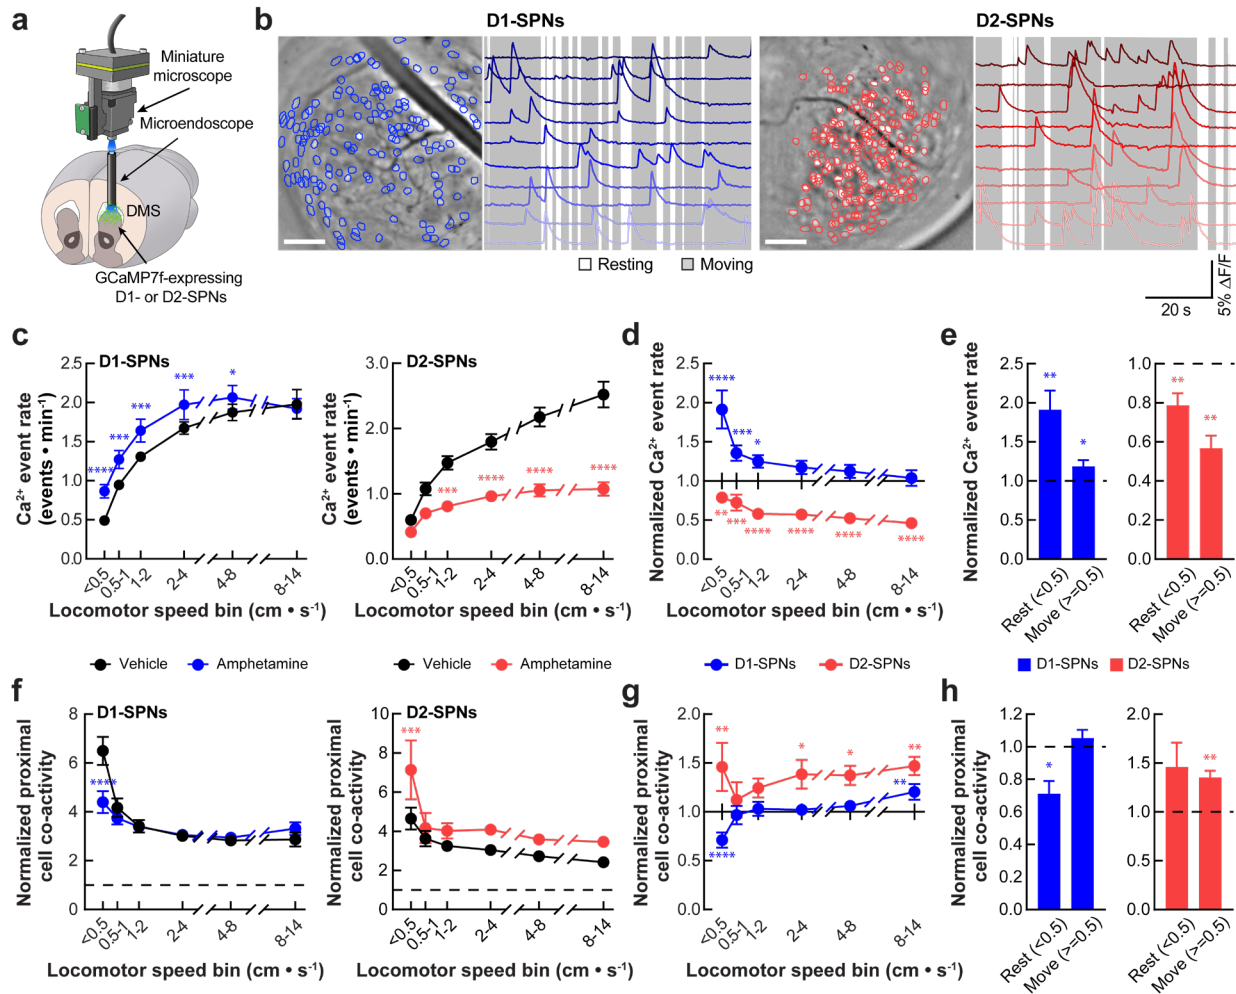

802 **Fig. 1: Effects of amphetamine treatment on D1- and D2-SPN  $Ca^{2+}$  activity in freely behav-**  
 803 **ing mice.** **a**, We used a miniature microscope and microendoscope to image  $Ca^{2+}$  activity in D1-  
 804 and D2-SPNs by expressing GCaMP7f in the dorsomedial striatum. **b**, Cell centroid locations  
 805 overlaid on the mean fluorescence images of dorsomedial striatum and example  $Ca^{2+}$  activity  
 806 traces from D1-SPNs and D2-SPNs in representative D1- (*left*) and A2A-Cre (*right*) mice. Scale  
 807 bar: 100  $\mu m$ . **c**, Effects of vehicle or amphetamine on  $Ca^{2+}$  event rates in D1- and D2-SPNs  
 808 across increasing locomotor speed bins. **d**,  $Ca^{2+}$  event rates in D1- and D2-SPNs following am-  
 809 phetamine treatment, normalized values following vehicle only treatment across different speed  
 810 bins. **e**, Effects of amphetamine on  $Ca^{2+}$  event rates in D1- and D2-SPN during resting ( $< 0.5$   
 811  $cm \cdot s^{-1}$ ) and moving ( $\geq 0.5$   $cm \cdot s^{-1}$ ) speed bins, normalized to mean values following vehicle  
 812 only treatment. **f**, Co-activity of proximal D1- and D2-SPN pairs (25–125  $\mu m$  separation) across

813 different speed bins, normalized to temporally shuffled comparisons following vehicle or am-  
814 phetamine treatment. **g**, Co-activity of proximal D1- and D2-SPN pairs at different speed bins  
815 after amphetamine treatment, first normalized to temporally shuffled comparisons and then to the  
816 mean, shuffle-normalized values following vehicle only treatment. **h**, Effects of amphetamine on  
817 co-activity of proximal D1- and D2-SPN pairs during resting and moving speed bins, normalized  
818 to temporally shuffled comparisons and then to values observed following vehicle only treat-  
819 ment. Data are expressed as mean  $\pm$  s.e.m. ( $N = 11$  D1-Cre and  $N = 10$  A2A-Cre mice; \*\*\*\* $P <$   
820  $0.0001$ , \*\*\* $P < 0.001$ , \*\* $P < 0.01$  and \* $P < 0.05$  comparing amphetamine to vehicle treatment;  
821 Holm-Sidak's multiple comparison test for **c**, **d**, **f**, and **g**; Wilcoxon signed-rank test for **e** and **h**).

822 **Figure 2**

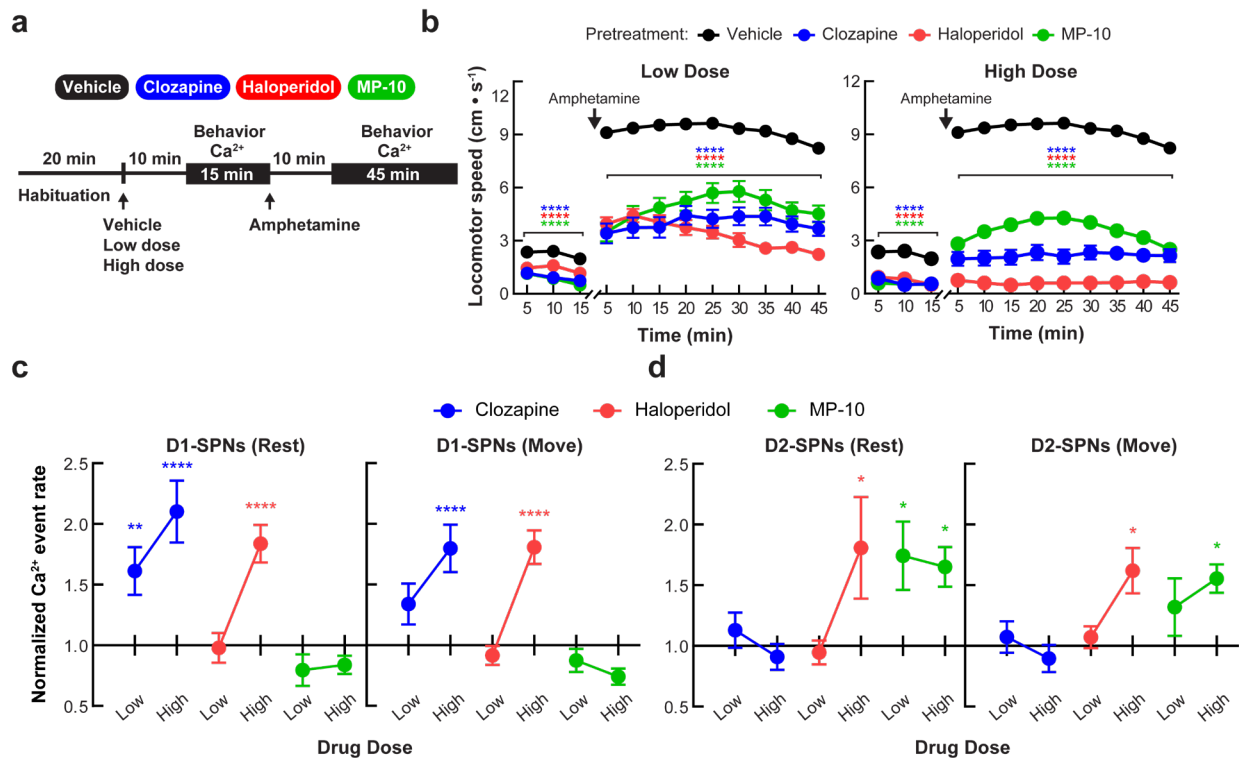

823 **Fig. 2: Effects of antipsychotic drugs on normal D1- and D2-SPN activity levels and spontaneous or amphetamine-driven locomotion.** **a**, To record behavior and Ca<sup>2+</sup> activity, we habitu-  
 824 ated the mice to the open field arena for 20 min before drug injection. After administering vehi-  
 825 cle or a dose of antipsychotic drug, we recorded behavior and Ca<sup>2+</sup> activity for 15 min, adminis-  
 826 tered amphetamine, and recorded Ca<sup>2+</sup> activity for an additional 45 min. All recordings began 10  
 827 min after vehicle, antipsychotic, or amphetamine treatment. We administered different antipsy-  
 828 chotic drug doses on consecutive days and gave the mice a day off between the different drugs.  
 829 **b**, Locomotor activity during the first 15 min recording period following vehicle or antipsychotic  
 830 drug treatment and the 45 min recording period after amphetamine treatment ( $N = 31$  mice;  
 831 \*\*\*\* $P < 0.0001$  comparing drug to vehicle and drug + amphetamine to vehicle + amphetamine  
 832 treatment; Holm-Sidak's multiple comparison test). **c**, **d**, Ca<sup>2+</sup> event rates in D1-SPNs (**c**) and  
 833 D2-SPNs (**d**) after low or high dose of antipsychotic drug treatment during rest and movement,  
 834 normalized to event rates following vehicle only treatment. Data are expressed as mean  $\pm$  s.e.m.  
 835 ( $N = 11$  D1-Cre and  $N = 10$  for A2A-Cre mice; \*\*\*\* $P < 0.0001$ , \*\* $P < 0.01$  and \* $P < 0.05$  com-  
 836 paring drug dose to vehicle treatment; Holm-Sidak's multiple comparison test).

838

839 **Figure 3**

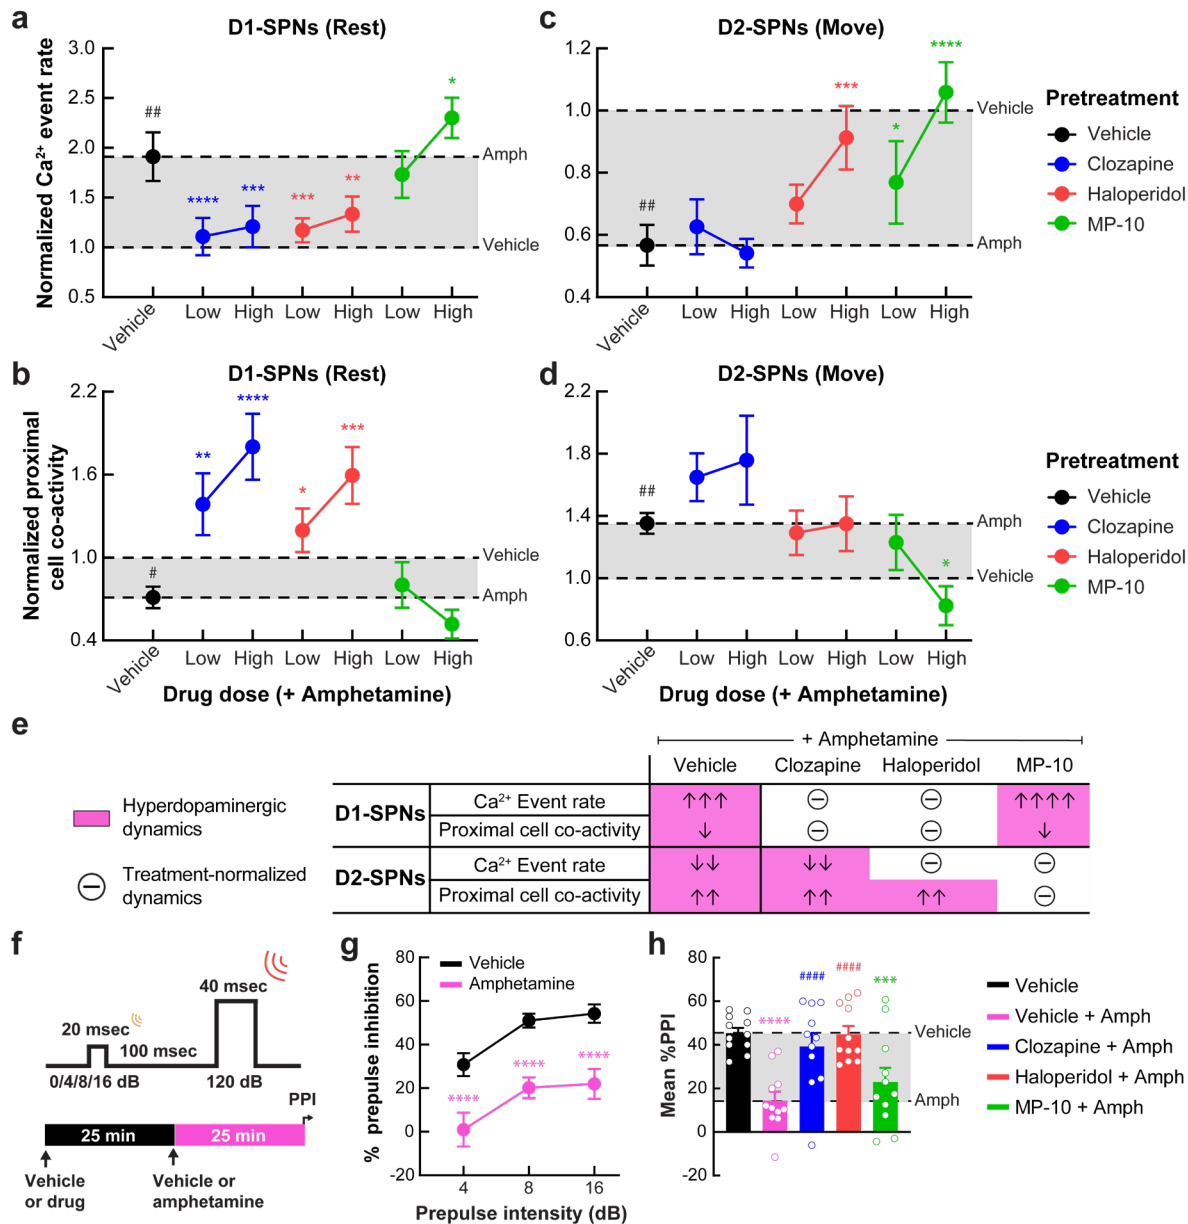

840 **Fig. 3: Differential effects of antipsychotic drugs on D1- and D2-SPN dynamics and sen-**  
 841 **sensorimotor gating under hyperdopaminergic conditions. a, b,** Ca<sup>2+</sup> event rates (**a**) and proxi-  
 842 mal co-activity (**b**) of D1-SPNs during periods of rest (locomotor speed < 0.5 cm·s<sup>-1</sup>) following  
 843 vehicle or drug + amphetamine treatment, normalized to values following vehicle only treatment.  
 844 **c, d,** Ca<sup>2+</sup> event rates (**c**) and proximal co-activity of D2-SPNs (**d**) during periods of movement  
 845 (locomotor speed ≥ 0.5 cm·s<sup>-1</sup>) following vehicle or drug + amphetamine treatment, normalized  
 846 to values following vehicle only treatment (*N* = 11 D1-Cre and *N* = 10 A2A-Cre mice; <sup>#</sup>*P* < 0.05  
 847 and <sup>##</sup>*P* < 0.01 comparing amphetamine to vehicle treatment; <sup>\*\*\*\*</sup>*P* < 0.0001, <sup>\*\*\*</sup>*P* < 0.001,

848 \*\* $P < 0.01$  and \* $P < 0.05$  comparing drug + amphetamine to vehicle + amphetamine treatment;  
849 Holm-Sidak's multiple comparison test). **e**, Summary of the effects of the different antipsychotic  
850 drugs on amphetamine-disrupted D1- and D2-SPN ensemble dynamics. Pink shading indicates  
851 the hyperdopaminergic neural ensemble dynamics. Encircled “–” denotes antipsychotic-normal-  
852 ized changes. Arrows denote effect sizes compared to vehicle only (for vehicle + amphetamine)  
853 or to vehicle + amphetamine (for antipsychotic + amphetamine; one arrow  $\geq 10\%$ , two arrows  
854  $\geq 30\%$ , and three arrows  $\geq 50\%$  statistically significant effect sizes; four arrows denotes the  
855 exacerbation of D1-SPN hyperactivity by MP-10 pre-treatment). **f**, We injected vehicle or anti-  
856 psychotic drug 25 min before amphetamine treatment and started measuring PPI 25 min after  
857 amphetamine treatment. **g**, **h**, Percent PPI of startle response at 4, 8, and 16 dB pre-pulse intensi-  
858 ties following vehicle or amphetamine only treatment (**g**) and mean percent PPI across all pre-  
859 pulse intensities following vehicle or drug + amphetamine treatment (**h**). All data are expressed  
860 as mean  $\pm$  s.e.m. ( $N = 11$ ; \*\*\*\* $P < 0.0001$ , \*\*\* $P < 0.001$  compared to vehicle only treatment;  
861 ##### $P < 0.0001$  comparing drug + amphetamine to vehicle + amphetamine treatment; Holm-  
862 Sidak's multiple comparison test).

863 **Figure 4**

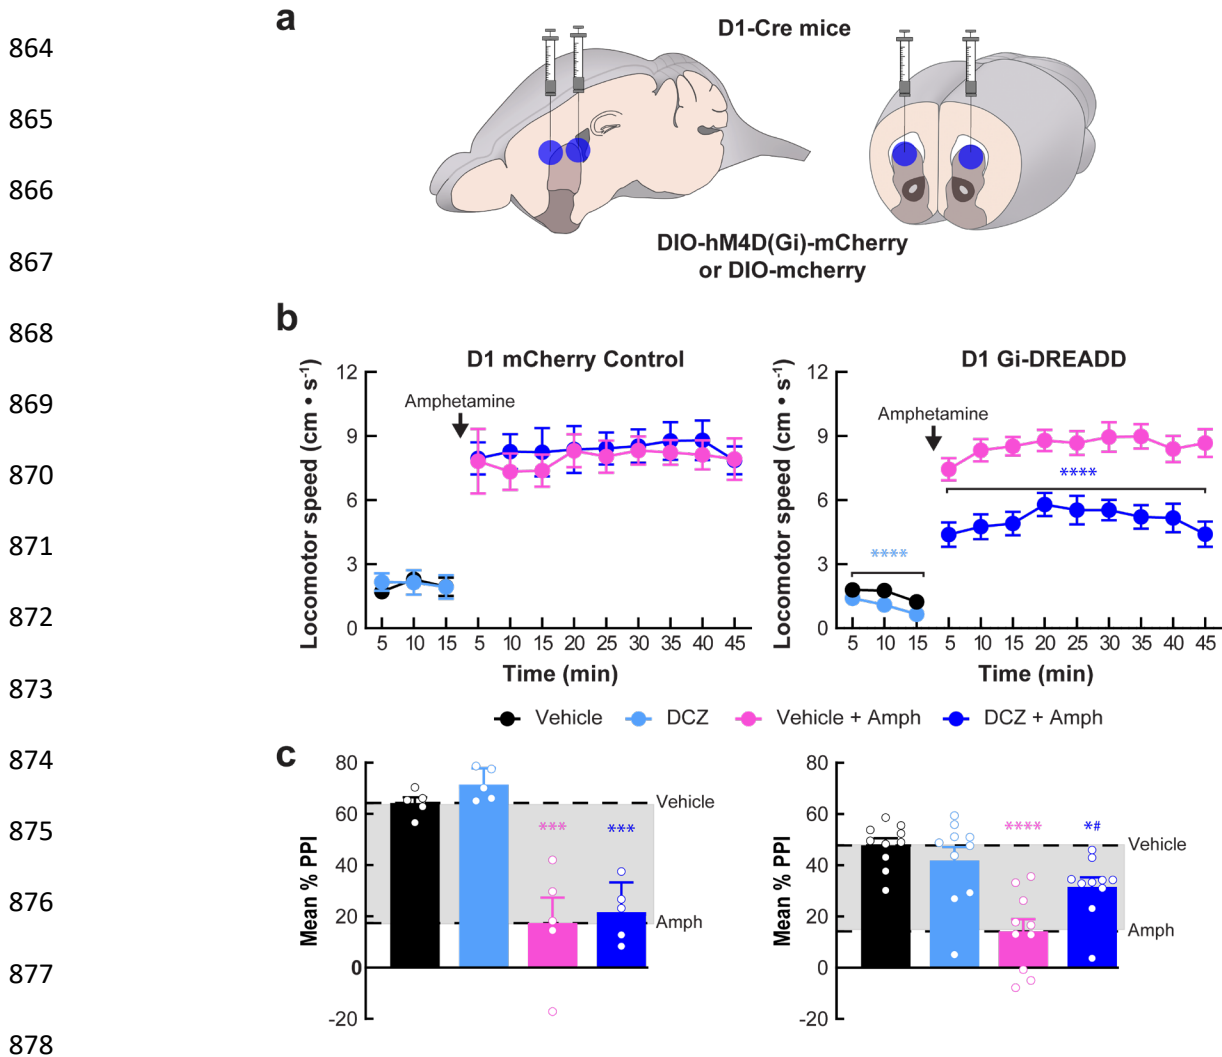

879 **Fig. 4: Inhibiting D1-SPNs is sufficient to rescue amphetamine-induced hyperlocomotion**  
880 **and PPI deficits.** **a**, We injected DIO-hM4D(G<sub>i</sub>)-mCherry or DIO-mCherry virus bilaterally at  
881 two sites in the dorsomedial striatum of D1-Cre mice. **b**, **c**, Treatment with the selective  
882 DREADD agonist deschloroclozapine (DCZ) reduced baseline locomotion and attenuated am-  
883 phetamine-driven hyperlocomotion (**b**) and PPI disruption (**c**) in D1-Cre mice expressing DIO-  
884 hM4D(G<sub>i</sub>)-mCherry (*right*), but not the control DIO-mCherry virus (*left*). All data are expressed  
885 as mean ± s.e.m. (*N* = 10 experimental and *N* = 5 control mice; \*\*\*\**P* < 0.0001, \*\*\**P* < 0.001,  
886 \**P* < 0.05 comparing vehicle or DCZ + amphetamine to vehicle only treatment; #*P* < 0.05 com-  
887 paring DCZ + amphetamine to vehicle + amphetamine; Holm-Sidak's multiple comparison test).



888 **Figure 5**

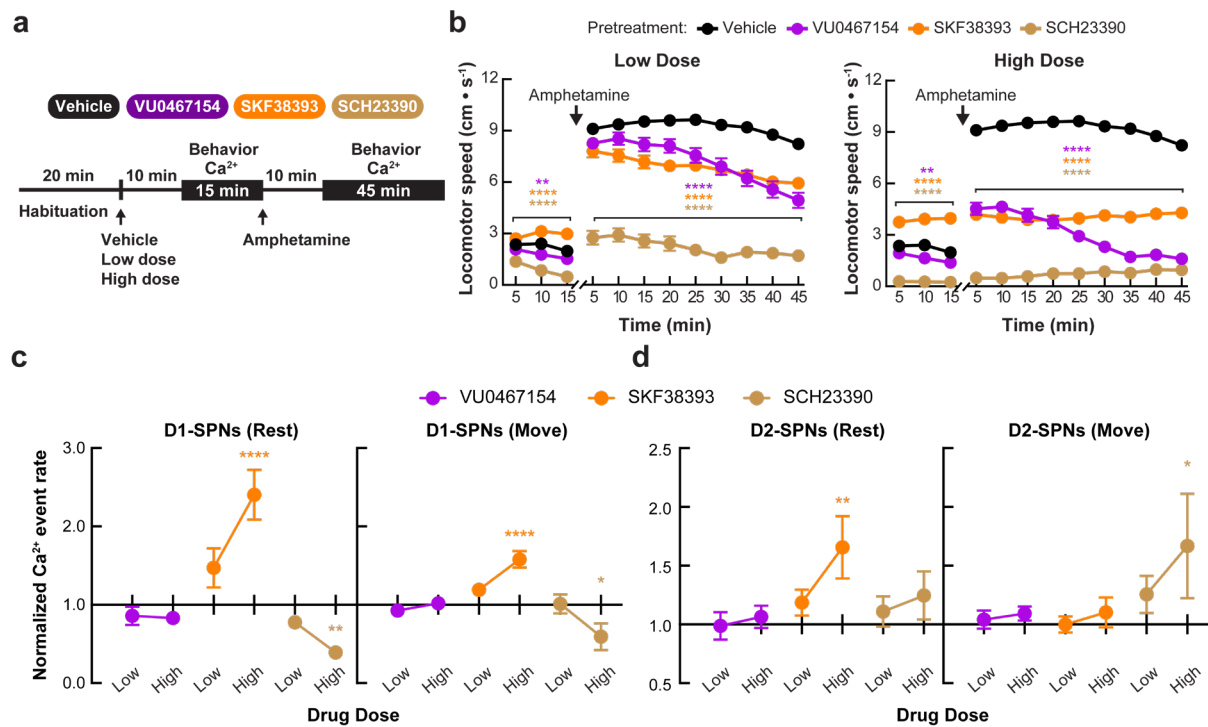

889 **Fig. 5: Effects of D1-SPN-targeted compounds on normal D1- and D2-SPN activity levels**  
 890 **and spontaneous or amphetamine-driven locomotion.** **a**, To record behavior and Ca<sup>2+</sup> activity,  
 891 we habituated the mice to the open field arena for 20 min before drug injection. After administer-  
 892 ing vehicle or a dose of a D1-SPN-targeted drug, we recorded behavior and Ca<sup>2+</sup> activity for 15  
 893 min, administered amphetamine, and recorded Ca<sup>2+</sup> activity for an additional 45 min. All record-  
 894 ings began 10 min after vehicle, drug, or amphetamine treatment. We administered different drug  
 895 doses on consecutive days and gave the mice a day off between the different drugs. **b**, Mean ±  
 896 s.e.m. locomotor speed during the first 15 min recording period following vehicle or drug treat-  
 897 ment and the 45 min recording period after amphetamine treatment ( $N = 31$  mice; \*\*\*\* $P <$   
 898 0.0001 and \*\* $P < 0.01$  comparing drug to vehicle and drug + amphetamine to vehicle + amphet-  
 899 amine treatment; Holm-Sidak's multiple comparison test). **c**, **d**, Mean ± s.e.m. Ca<sup>2+</sup> event rates in  
 900 D1-SPNs (**c**) and D2-SPNs (**d**) after treatment with a low or high dose of D1-SPN-targeted com-  
 901 pounds during rest (*left*) and movement (*right*), normalized to event rates following vehicle only  
 902 treatment ( $N = 11$  D1-Cre and  $N = 10$  for A2A-Cre mice; \*\*\*\* $P < 0.0001$ , \*\* $P < 0.01$  and \* $P <$   
 903 0.05 comparing drug to vehicle treatment; Holm-Sidak's multiple comparison test).

904



905 **Figure 6**

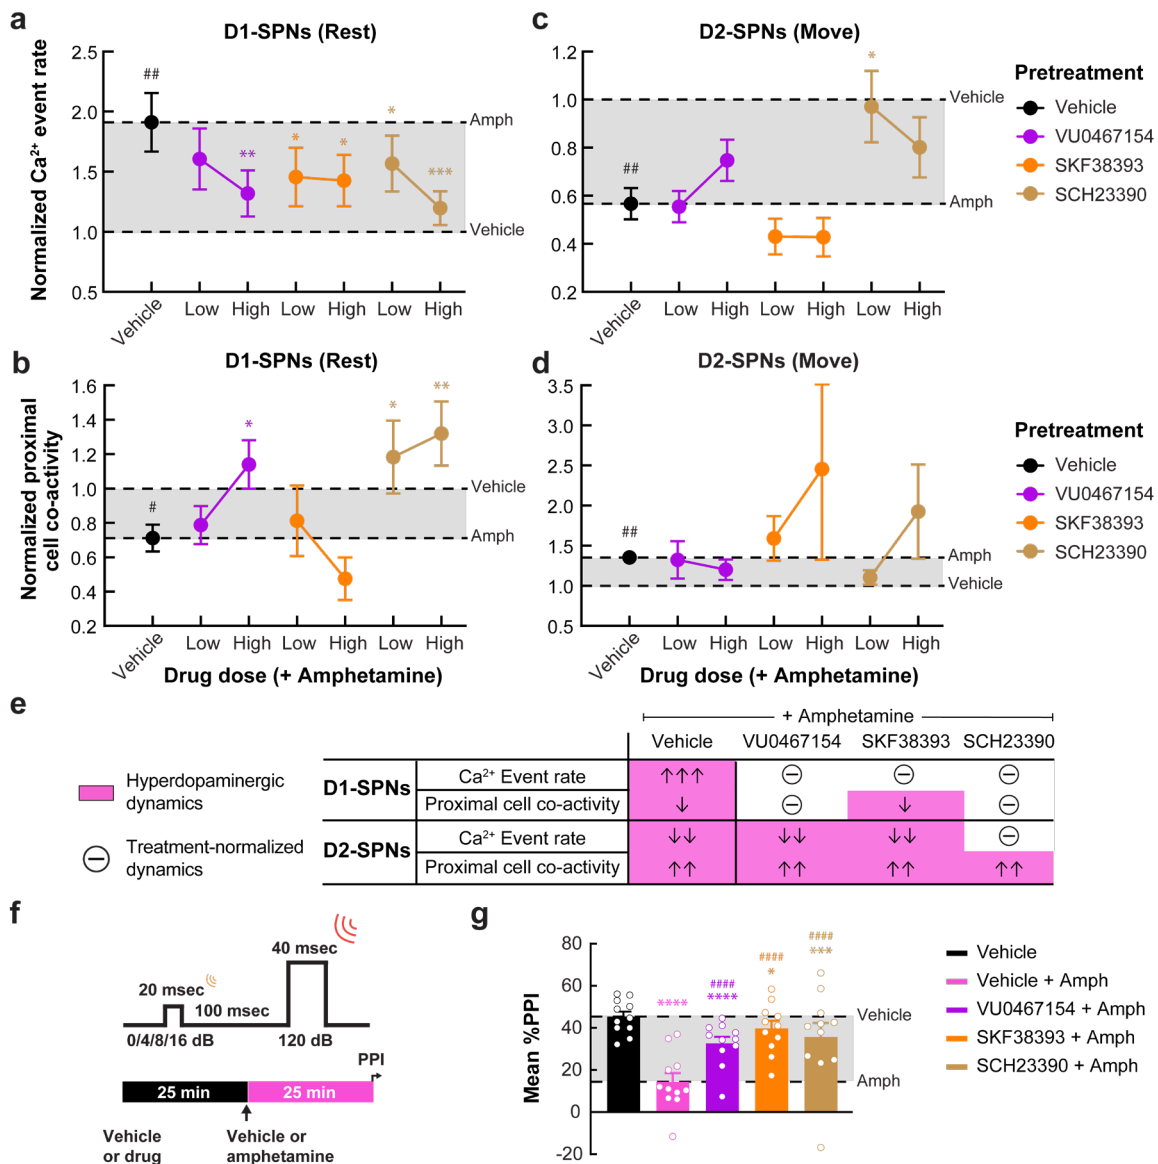

906 **Fig. 6: D1-SPN-targeted targeting normalized hyperdopaminergic D1-SPN dynamics and**  
 907 **deficits in sensorimotor gating. a, b, Ca<sup>2+</sup> event rates (a) and proximal co-activity (b) of D1-**  
 908 **SPNs during periods of rest following vehicle or drug + amphetamine treatment, normalized to**  
 909 **values following vehicle only treatment. c, d, Ca<sup>2+</sup> event rates (c) and proximal co-activity of**  
 910 **D2-SPNs (d) during periods of movement following vehicle or drug + amphetamine treatment,**  
 911 **normalized to values following vehicle only treatment. Data are represented as mean ± s.e.m. (N**  
 912 **= 11 D1-Cre and N = 10 A2A-Cre mice; #P < 0.05 and ##P < 0.01 comparing amphetamine to ve-**  
 913 **hicle treatment; \*\*\*P < 0.001, \*\*P < 0.01 and \*P < 0.05 comparing drug + amphetamine to ve-**

914 hicle + amphetamine treatment; Holm-Sidak's multiple comparison test). **e**, Summary of the ef-  
915 fects of different D1-SPN-targeted compounds amphetamine-disrupted D1- and D2-SPN ensem-  
916 ble dynamics. Pink shading indicates neural ensemble dynamics under hyperdopaminergic states.  
917 Effect sizes are represented as in **Fig. 3e**. **f**, We injected vehicle or D1-SPN-targeted drug 25 min  
918 before amphetamine treatment and started measuring PPI 25 min after amphetamine treatment. **g**,  
919 Mean  $\pm$  s.e.m. percent PPI across all pre-pulse intensities following vehicle or drug + ampheta-  
920 mine treatment. ( $N = 11$ ; \*\*\*\* $P < 0.0001$ , \*\*\* $P < 0.001$  and \* $P < 0.05$  compared to vehicle  
921 treatment; #### $P < 0.0001$  compared to vehicle + amphetamine treatment; Holm-Sidak's multiple  
922 comparison test).

923 **Supplementary Information**

924 **Extended Data Figure 1**

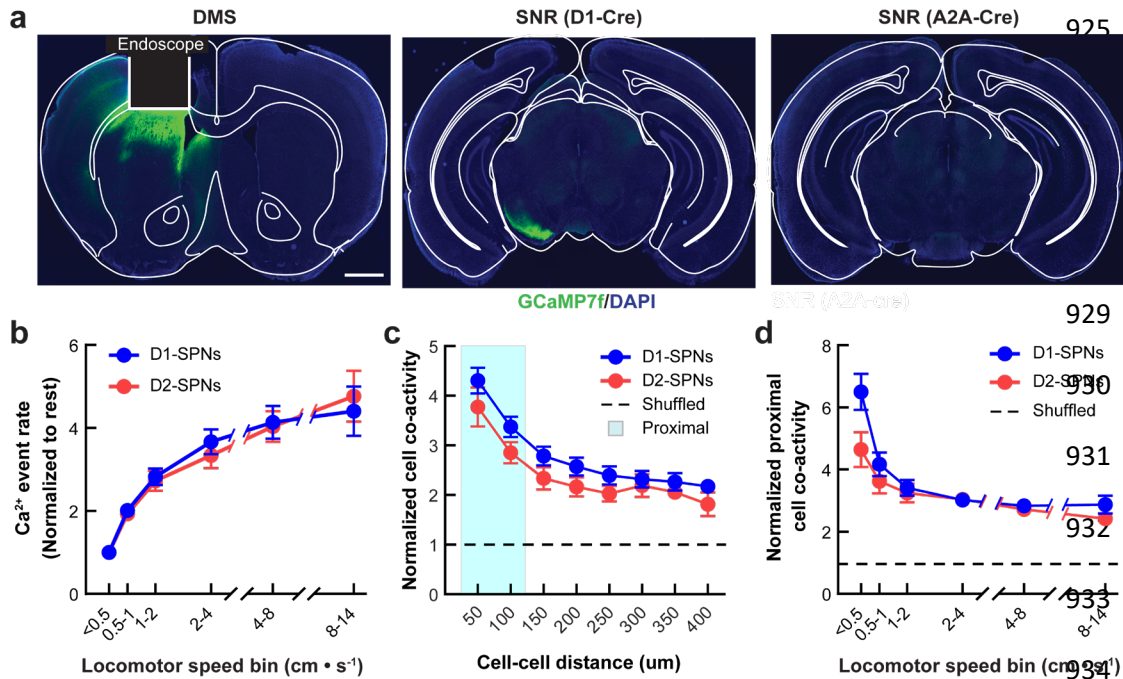

935 **Extended Data Fig. 1: Quantifying normal D1- and D2-SPN ensemble dynamics.** **a**, Repre-  
 936 sentative coronal brain sections of dorsomedial striatum and substantia nigra from experimental  
 937 D1- or A2A-Cre mice (green: anti-GFP; blue: DAPI nuclear stain; scale bar: 1 mm). White lines  
 938 indicate the position of the implanted microendoscope and boundaries of brain areas. **b**,  $Ca^{2+}$   
 939 event rates in D1- and D2-SPNs at different speed bins normalized to event rate levels at rest (lo-  
 940 comotor speed  $< 0.5 \text{ cm} \cdot \text{s}^{-1}$ ). **c**, Co-activity (jaccard index) of D1-SPN or D2-SPN pairs during  
 941 movement (locomotor speed  $\geq 0.5 \text{ cm} \cdot \text{s}^{-1}$ ) versus the separation of cell pairs normalized to tem-  
 942 porally shuffled datasets (dashed line). Cyan shading indicates proximally (25–125  $\mu m$ ) cell  
 943 pairs. **d**, Co-activity of proximal D1- and D2-SPN pairs at increasing bins of locomotor speed,  
 944 normalized to temporally shuffled comparisons (dashed line). Data are expressed as mean  $\pm$   
 945 s.e.m. ( $N = 11$  D1-Cre and  $N = 10$  for A2A-Cre mice; data were averaged across all recordings  
 946 following vehicle only treatment).

947 **Extended Data Figure 2**

948

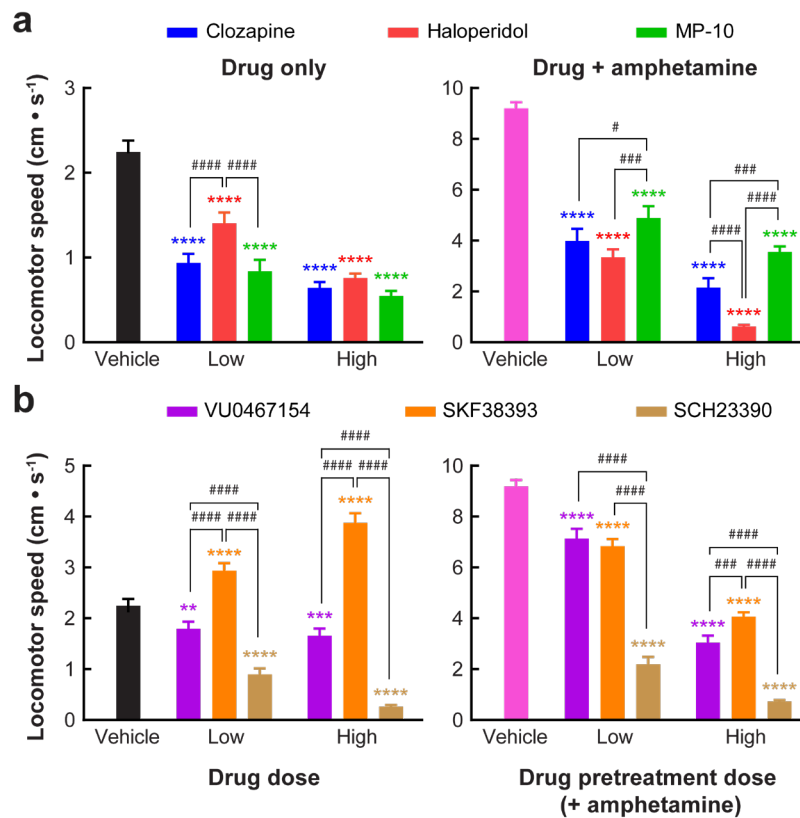

954

955

956

957

958

959

960 **Extended Data Fig. 2: Effects of antipsychotic and D1-SPN-targeted drugs on normal and**

961 **amphetamine-driven locomotor activity. a, b, Running speed following treatment with vehi-**

962 **cle, antipsychotics (a) or D1-SPN-targeted compounds (b) with (right) or without amphetamine**

963 **co-treatment (left). Data are represented as mean  $\pm$  s.e.m. ( $N = 31$  mice; \*\*\*\* $P < 0.0001$ , \*\*\* $P <$**

964  **$0.001$ , \*\* $P < 0.01$  and \* $P < 0.05$  compared to vehicle only treatment; #### $P < 0.0001$ , ### $P <$**

965  **$0.001$  and # $P < 0.05$  comparing the different drug treatment combinations; Holm-Sidak's multi-**

966 **ple comparison test).**

967

968

969

970

971

972

973 **Extended Data Figure 3**

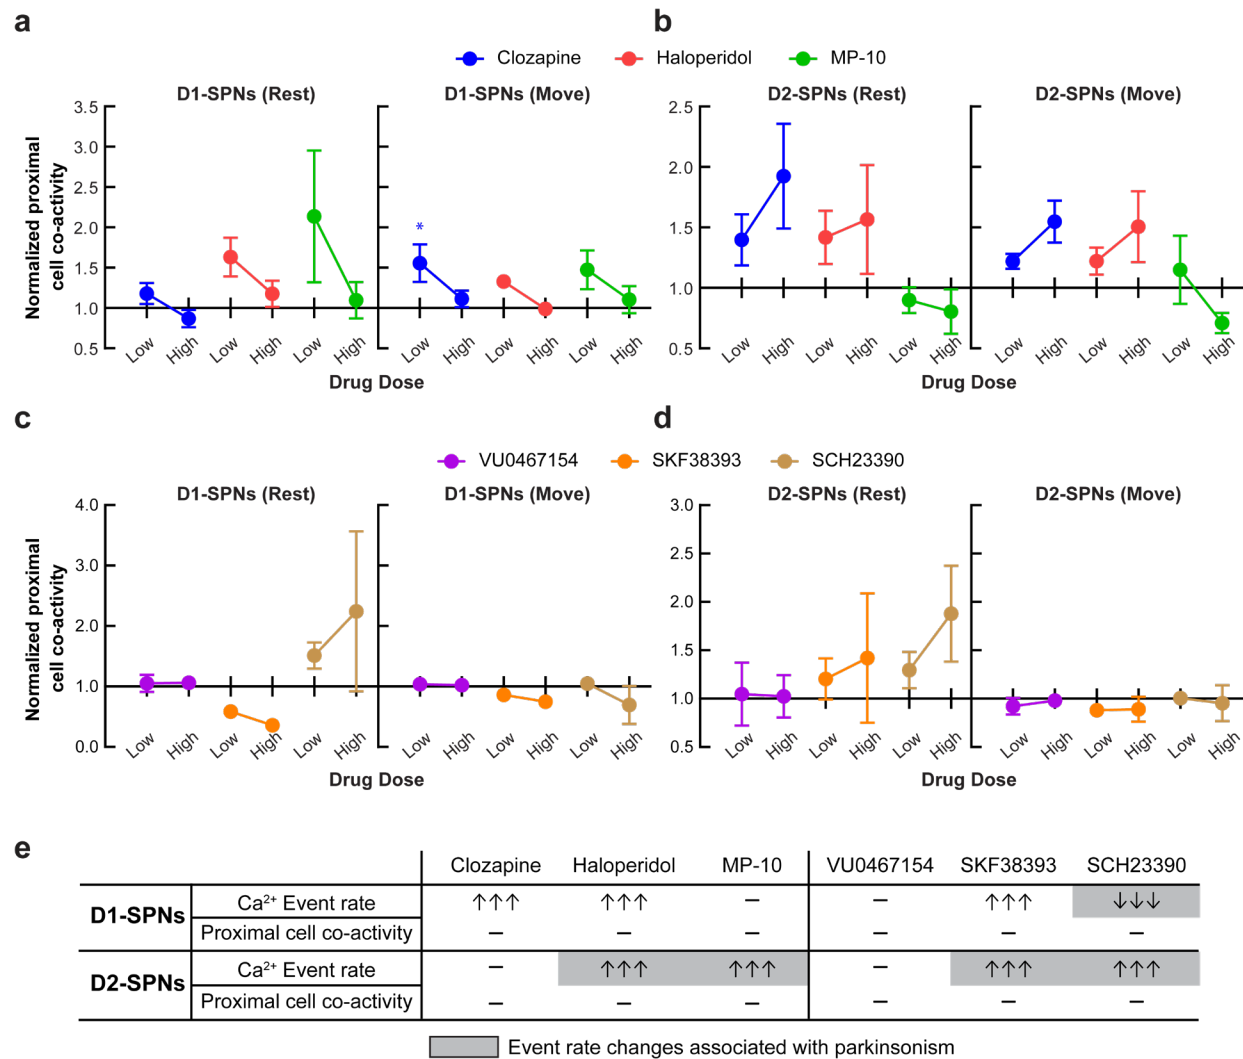

974 **Extended Data Fig. 3: Effects of antipsychotic and D1-SPN-targeted drugs on the proximal**  
 975 **co-activity of D1- and D2-SPN under normal conditions. a, b,** Co-activity of proximal D1- (a)  
 976 and D2-SPN (b) pairs during rest and movement following clozapine, haloperidol, or MP-10 ad-  
 977 ministration. **c, d,** Proximal co-activity in D1- (c) and D2-SPNs (d) during rest and movement  
 978 following VU0467154, SKF38393, or SCH23390 administration. Proximal co-activity values  
 979 were first binned by locomotor speed, normalized to comparisons in temporally shuffled datasets  
 980 within each speed bin, and normalized to the corresponding values following vehicle only treat-  
 981 ment. Data are expressed as mean ± s.e.m. (*N* = 11 D1-Cre and *N* = 10 A2A-Cre mice; \**P* < 0.05  
 982 compared to vehicle treatment; Holm-Sidak's multiple comparison test). **e,** Summary of the ef-

983   fects of different antipsychotic and D1-SPN-targeted drugs on D1- and D2-SPN ensemble dy-  
984   namics under normal conditions. Each arrow denotes mean changes of  $\geq 50\%$  at the highest  
985   dose tested (see also **Fig. 2c, d**).

986

987

988

989

990

991

992

993

994

995

996

997

998

999

1000

1001

1002

1003

1004

1005

1006

1007

1008 **Extended Data Figure 4**

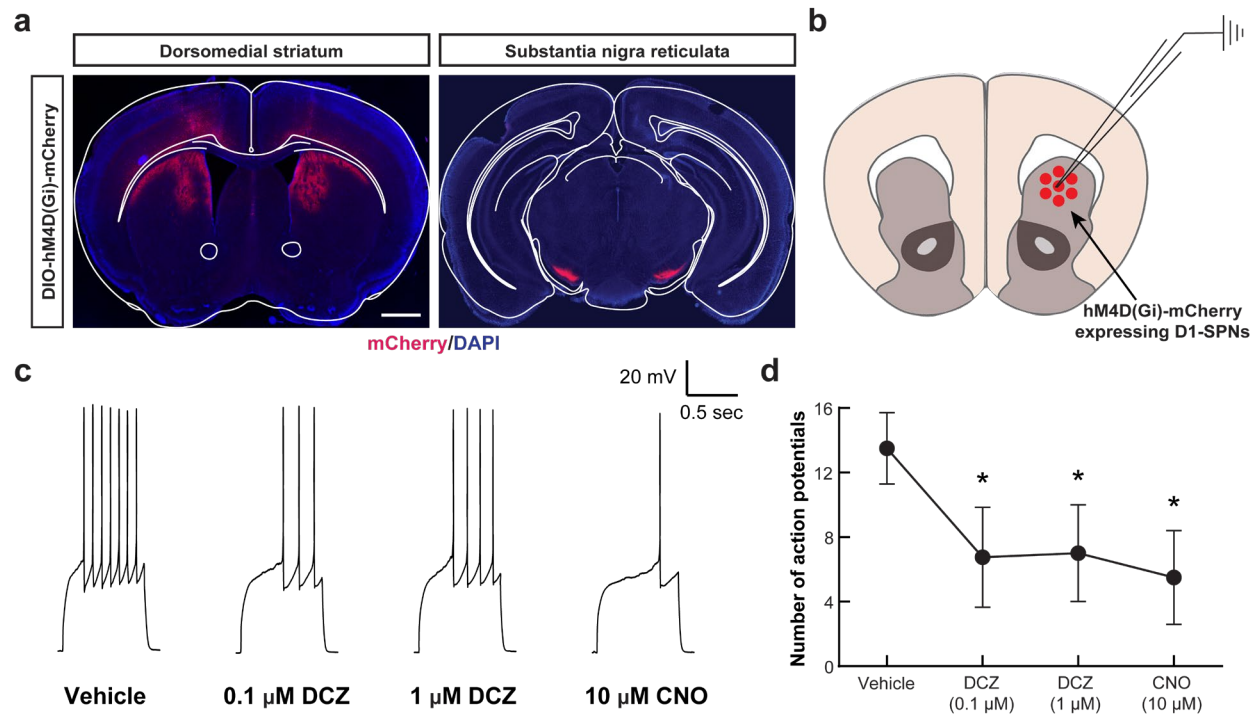

1009 **Extended Data Fig. 4: Histological and electrophysiological characterization of hM4Di-**  
1010 **mCherry expression and function.** **a**, Representative coronal brain sections of dorsomedial stri-  
1011 atum and substantia nigra from experimental D1-Cre mice. Red indicates hM4Di-mCherry and  
1012 blue indicates DAPI nuclear stain. Scale bar, 1 mm (see also **Fig. 4**). **b**, We performed patch-  
1013 clamp electrophysiological recordings from hM4Di-mCherry-expressing neurons in the DMS of  
1014 D1-Cre mice. **c**, Representative traces of action potential responses to 250 pA current injection.  
1015 **d**, Number of action potentials following vehicle, DCZ or CNO treatment. Data are expressed as  
1016 mean  $\pm$  s.e.m. ( $N = 4$ ;  $*P < 0.05$  compared to vehicle treatment; Holm-Sidak's multiple compari-  
1017 son test).

1018

1019

1020

1021

1022

1023

1024 **Supplementary Table 1**

| Figure  | Comparison                                                                               | Test                                                        | p-value                                                 | N-value |
|---------|------------------------------------------------------------------------------------------|-------------------------------------------------------------|---------------------------------------------------------|---------|
| Fig. 1c | D1-SPN event rates across speeds<br>(Vehicle vs Amphetamine)                             | Two-way repeated measures ANOVA                             | Speed: <0.0001<br>Treat: 0.0686<br>Interaction: 0.0020  | N = 11  |
|         |                                                                                          | <b>Multiple comparisons (Holm-Sidak corrected p-values)</b> |                                                         |         |
|         |                                                                                          | <0.5                                                        | <0.0001                                                 |         |
|         |                                                                                          | 0.5-1                                                       | 0.0003                                                  |         |
|         |                                                                                          | 1-2                                                         | 0.0003                                                  |         |
|         |                                                                                          | 2-4                                                         | 0.0008                                                  |         |
|         |                                                                                          | 4-8                                                         | 0.0288                                                  |         |
|         | 8-14                                                                                     | 0.4619                                                      |                                                         |         |
|         | D2-SPN event rates across speeds<br>(Vehicle vs Amphetamine)                             | Mixed-effects model                                         | Speed: <0.0001<br>Treat: 0.0002<br>Interaction: <0.0001 | N = 10  |
|         |                                                                                          | <b>Multiple comparisons (Holm-Sidak corrected p-values)</b> |                                                         |         |
| <0.5    |                                                                                          | 0.2695                                                      |                                                         |         |
| 0.5-1   |                                                                                          | 0.0721                                                      |                                                         |         |
| 1-2     |                                                                                          | 0.0010                                                      |                                                         |         |
| 2-4     |                                                                                          | <0.0001                                                     |                                                         |         |
| 4-8     |                                                                                          | <0.0001                                                     |                                                         |         |
| 8-14    | <0.0001                                                                                  |                                                             |                                                         |         |
| Fig. 1d | D1-SPN event rates, normalized to vehicle,<br>across the speeds (Vehicle vs Amphetamine) | Two-way repeated measures ANOVA                             | Speed: <0.0001<br>Treat: 0.0141<br>Interaction: <0.0001 | N = 11  |
|         |                                                                                          | <b>Multiple comparisons (Holm-Sidak corrected p-values)</b> |                                                         |         |
|         |                                                                                          | <0.5                                                        | <0.0001                                                 |         |
|         |                                                                                          | 0.5-1                                                       | 0.0005                                                  |         |
|         |                                                                                          | 1-2                                                         | 0.0188                                                  |         |
|         |                                                                                          | 2-4                                                         | 0.1336                                                  |         |
|         |                                                                                          | 4-8                                                         | 0.2844                                                  |         |
|         | 8-14                                                                                     | 0.6668                                                      |                                                         |         |
|         | D2-SPN event rates, normalized to vehicle,<br>across the speeds (Vehicle vs Amphetamine) | Mixed-effects model                                         | Drug: <0.0001<br>Treat: 0.0001<br>Interaction: <0.0001  | N = 10  |
|         |                                                                                          | <b>Multiple comparisons (Holm-Sidak corrected p-values)</b> |                                                         |         |
| <0.5    |                                                                                          | 0.0021                                                      |                                                         |         |
| 0.5-1   |                                                                                          | 0.0005                                                      |                                                         |         |
| 1-2     |                                                                                          | <0.0001                                                     |                                                         |         |
| 2-4     |                                                                                          | <0.0001                                                     |                                                         |         |
| 4-8     |                                                                                          | <0.0001                                                     |                                                         |         |
| 8-14    | <0.0001                                                                                  |                                                             |                                                         |         |
| Fig. 1e | D1-SPN event rates, normalized to vehicle, at rest<br>(Vehicle vs Amphetamine)           | Wilcoxon signed-rank                                        | 0.0098                                                  | N = 11  |
|         | D1-SPN event rates, normalized to vehicle, during movement<br>(Vehicle vs Amphetamine)   | Wilcoxon signed-rank                                        | 0.0420                                                  |         |
|         | D2-SPN event rates, normalized to vehicle, at rest<br>(Vehicle vs Amphetamine)           | Wilcoxon signed-rank                                        | 0.0039                                                  | N = 10  |
|         | D2-SPN event rates, normalized to vehicle, during movement<br>(Vehicle vs Amphetamine)   | Wilcoxon signed-rank                                        | 0.0020                                                  |         |

1025

1026

1027

1028

1029

1030

1031

1032



|         |                                                                                                                                                                      |                                                             |                                                                            |        |
|---------|----------------------------------------------------------------------------------------------------------------------------------------------------------------------|-------------------------------------------------------------|----------------------------------------------------------------------------|--------|
| Fig. 1f | D1-SPN proximal cell co-activity (20-100 $\mu$ m), normalized to shuffled, across the speeds (Vehicle vs Amphetamine)                                                | Two-way repeated measures ANOVA                             | Drug: <b>&lt;0.0001</b><br>Treat: 0.1644<br>Interaction: <b>&lt;0.0001</b> | N = 11 |
|         |                                                                                                                                                                      | <b>Multiple comparisons (Holm-Sidak corrected p-values)</b> |                                                                            |        |
|         |                                                                                                                                                                      | <0.5                                                        | <b>&lt;0.0001</b>                                                          |        |
|         |                                                                                                                                                                      | 0.5-1                                                       | 0.4694                                                                     |        |
|         |                                                                                                                                                                      | 1-2                                                         | 0.9842                                                                     |        |
|         |                                                                                                                                                                      | 2-4                                                         | 0.9842                                                                     |        |
|         | 4-8                                                                                                                                                                  | 0.9670                                                      |                                                                            |        |
|         | 8-14                                                                                                                                                                 | 0.4694                                                      |                                                                            |        |
|         | D2-SPN proximal cell co-activity (20-100 $\mu$ m), normalized to shuffled, across the speeds (Vehicle vs Amphetamine)                                                | Mixed-effects model                                         | Drug: <b>&lt;0.0001</b><br>Treat: <b>0.0010</b><br>Interaction: 0.2475     | N = 10 |
|         |                                                                                                                                                                      | <b>Multiple comparisons (Holm-Sidak corrected p-values)</b> |                                                                            |        |
| <0.5    |                                                                                                                                                                      | <b>0.0006</b>                                               |                                                                            |        |
| 0.5-1   |                                                                                                                                                                      | 0.3190                                                      |                                                                            |        |
| 1-2     |                                                                                                                                                                      | 0.3031                                                      |                                                                            |        |
| 2-4     |                                                                                                                                                                      | 0.2525                                                      |                                                                            |        |
| 4-8     |                                                                                                                                                                      | 0.3031                                                      |                                                                            |        |
| 8-14    |                                                                                                                                                                      | 0.2525                                                      |                                                                            |        |
| Fig. 1g | D1-SPN proximal cell co-activity (20-100 $\mu$ m), first normalized to shuffled and then normalized to vehicle treatment, across the speeds (Vehicle vs Amphetamine) | Two-way repeated measures ANOVA                             | Drug: <b>&lt;0.0001</b><br>Treat: 0.9885<br>Interaction: <b>&lt;0.0001</b> | N = 11 |
|         |                                                                                                                                                                      | <b>Multiple comparisons (Holm-Sidak corrected p-values)</b> |                                                                            |        |
|         |                                                                                                                                                                      | <0.5                                                        | <b>&lt;0.0001</b>                                                          |        |
|         |                                                                                                                                                                      | 0.5-1                                                       | 0.9257                                                                     |        |
|         |                                                                                                                                                                      | 1-2                                                         | 0.9257                                                                     |        |
|         |                                                                                                                                                                      | 2-4                                                         | 0.9257                                                                     |        |
|         | 4-8                                                                                                                                                                  | 0.7455                                                      |                                                                            |        |
|         | 8-14                                                                                                                                                                 | <b>0.0043</b>                                               |                                                                            |        |
|         | D2-SPN proximal cell co-activity (20-100 $\mu$ m), first normalized to shuffled and then normalized to vehicle treatment, across the speeds (Vehicle vs Amphetamine) | Mixed-effects model                                         | Drug: 0.4755<br>Treat: <b>&lt;0.0001</b><br>Interaction: 0.4755            | N = 10 |
|         |                                                                                                                                                                      | <b>Multiple comparisons (Holm-Sidak corrected p-values)</b> |                                                                            |        |
| <0.5    |                                                                                                                                                                      | <b>0.0096</b>                                               |                                                                            |        |
| 0.5-1   |                                                                                                                                                                      | 0.3835                                                      |                                                                            |        |
| 1-2     |                                                                                                                                                                      | 0.1591                                                      |                                                                            |        |
| 2-4     |                                                                                                                                                                      | 0.0282                                                      |                                                                            |        |
| 4-8     |                                                                                                                                                                      | 0.0282                                                      |                                                                            |        |
| 8-14    |                                                                                                                                                                      | <b>0.0068</b>                                               |                                                                            |        |
| Fig. 1h | D1-SPN proximal cell co-activity (20-100 $\mu$ m), first normalized to shuffled and then normalized to vehicle treatment, at rest (Vehicle vs Amphetamine)           | Wilcoxon signed-rank                                        | <b>0.0244</b>                                                              | N = 11 |
|         | D1-SPN proximal cell co-activity (20-100 $\mu$ m), first normalized to shuffled and then normalized to vehicle treatment, during movement (Vehicle vs Amphetamine)   | Wilcoxon signed-rank                                        | 0.3652                                                                     |        |
|         | D2-SPN proximal cell co-activity (20-100 $\mu$ m), first normalized to shuffled and then normalized to vehicle treatment, at rest (Vehicle vs Amphetamine)           | Wilcoxon signed-rank                                        | 0.1484                                                                     | N = 10 |
|         | D2-SPN proximal cell co-activity (20-100 $\mu$ m), first normalized to shuffled and then normalized to vehicle treatment, during movement (Vehicle vs Amphetamine)   | Wilcoxon signed-rank                                        | <b>0.0078</b>                                                              |        |

| Figure                                               | Comparison                                                                                           | Test                                                 | p-value                                                 | N-value |           |
|------------------------------------------------------|------------------------------------------------------------------------------------------------------|------------------------------------------------------|---------------------------------------------------------|---------|-----------|
| Fig. 2b                                              | Locomotor speeds following low dose of drug treatments (Vehicle vs Drug)                             | Two-way repeated measures ANOVA                      | Speed: <0.0001<br>Drug: <0.0001<br>Interaction: 0.1916  | N = 31  |           |
|                                                      |                                                                                                      | Multiple comparisons (Holm-Sidak corrected p-values) |                                                         |         |           |
|                                                      |                                                                                                      | Clozapine                                            | <0.0001                                                 |         |           |
|                                                      |                                                                                                      | Haloperidol                                          | <0.0001                                                 |         |           |
|                                                      | MP-10                                                                                                | <0.0001                                              |                                                         |         |           |
|                                                      | Locomotor speeds following low dose of drug treatments (Vehicle +Amphetamine vs Drug + Amphetamine)  | Two-way repeated measures ANOVA                      | Speed: <0.0001<br>Drug: <0.0001<br>Interaction: <0.0001 |         |           |
|                                                      |                                                                                                      | Multiple comparisons (Holm-Sidak corrected p-values) |                                                         |         |           |
|                                                      |                                                                                                      | Clozapine                                            | <0.0001                                                 |         |           |
|                                                      |                                                                                                      | Haloperidol                                          | <0.0001                                                 |         |           |
|                                                      | MP-10                                                                                                | <0.0001                                              |                                                         |         |           |
|                                                      | Locomotor speeds following high dose of drug treatments (Vehicle vs Drug)                            | Two-way repeated measures ANOVA                      | Speed: <0.0001<br>Drug: <0.0001<br>Interaction: 0.0025  |         |           |
|                                                      |                                                                                                      | Multiple comparisons (Holm-Sidak corrected p-values) |                                                         |         |           |
|                                                      |                                                                                                      | Clozapine                                            | <0.0001                                                 |         |           |
|                                                      |                                                                                                      | Haloperidol                                          | <0.0001                                                 |         |           |
|                                                      | MP-10                                                                                                | <0.0001                                              |                                                         |         |           |
|                                                      | Locomotor speeds following high dose of drug treatments (Vehicle +Amphetamine vs Drug + Amphetamine) | Two-way repeated measures ANOVA                      | Speed: <0.0001<br>Drug: <0.0001<br>Interaction: <0.0001 |         |           |
| Multiple comparisons (Holm-Sidak corrected p-values) |                                                                                                      |                                                      |                                                         |         |           |
| Clozapine                                            |                                                                                                      | <0.0001                                              |                                                         |         |           |
| Haloperidol                                          |                                                                                                      | <0.0001                                              |                                                         |         |           |
| MP-10                                                | <0.0001                                                                                              |                                                      |                                                         |         |           |
| Fig. 2c                                              | D1-SPN event rates at rest across drug treatments (Vehicle vs Drug)                                  | One-way repeated measures ANOVA                      | <0.0001                                                 | N = 11  |           |
|                                                      |                                                                                                      | Multiple comparisons (Holm-Sidak corrected p-values) |                                                         |         |           |
|                                                      |                                                                                                      |                                                      | Low dose                                                |         | High Dose |
|                                                      |                                                                                                      | Clozapine                                            | 0.0031                                                  |         | <0.0001   |
|                                                      |                                                                                                      | Haloperidol                                          | 0.9023                                                  |         | <0.0001   |
|                                                      | MP-10                                                                                                | 0.5660                                               | 0.5816                                                  |         |           |
|                                                      | D1-SPN event rates during movement across drug treatments (Vehicle vs Drug)                          | Mixed-effects model                                  | <0.0001                                                 |         |           |
|                                                      |                                                                                                      | Multiple comparisons (Holm-Sidak corrected p-values) |                                                         |         |           |
|                                                      |                                                                                                      |                                                      | Low dose                                                |         | High Dose |
|                                                      |                                                                                                      | Clozapine                                            | 0.1188                                                  |         | <0.0001   |
| Haloperidol                                          |                                                                                                      | 0.6575                                               | <0.0001                                                 |         |           |
| MP-10                                                | 0.6575                                                                                               | 0.2607                                               |                                                         |         |           |
| Fig. 2d                                              | D2-SPN event rates at rest across drug treatments (Vehicle vs Drug)                                  | Mixed-effects model                                  | 0.0008                                                  | N = 10  |           |
|                                                      |                                                                                                      | Multiple comparisons (Holm-Sidak corrected p-values) |                                                         |         |           |
|                                                      |                                                                                                      |                                                      | Low dose                                                |         | High Dose |
|                                                      |                                                                                                      | Clozapine                                            | 0.9405                                                  |         | 0.9816    |
|                                                      |                                                                                                      | Haloperidol                                          | 0.9714                                                  |         | 0.0131    |
|                                                      | MP-10                                                                                                | 0.0320                                               | 0.0478                                                  |         |           |
|                                                      | D2-SPN event rates during movement across drug treatments (Vehicle vs Drug)                          | Mixed-effects model                                  | 0.0018                                                  |         |           |
|                                                      |                                                                                                      | Multiple comparisons (Holm-Sidak corrected p-values) |                                                         |         |           |
|                                                      |                                                                                                      |                                                      | Low dose                                                |         | High Dose |
|                                                      |                                                                                                      | Clozapine                                            | 0.9435                                                  |         | 0.9435    |
| Haloperidol                                          |                                                                                                      | 0.9435                                               | 0.0137                                                  |         |           |
| MP-10                                                | 0.3891                                                                                               | 0.0293                                               |                                                         |         |           |

| Figure                                                         | Comparison                                                                                                                                                                         | Test                                                 | p-value                                             | N-value |           |
|----------------------------------------------------------------|------------------------------------------------------------------------------------------------------------------------------------------------------------------------------------|------------------------------------------------------|-----------------------------------------------------|---------|-----------|
| Fig. 3a                                                        | D1-SPN event rates, normalized to vehicle, at rest (Vehicle vs Amphetamine)                                                                                                        | Wilcoxon signed-rank                                 | 0.0098                                              | N = 11  |           |
|                                                                | D1-SPN event rates at rest across drug treatments (Vehicle + Amphetamine vs Drug + Amphetamine)                                                                                    | One-way repeated measures ANOVA                      | <0.0001                                             |         |           |
|                                                                |                                                                                                                                                                                    | Multiple comparisons (Holm-Sidak corrected p-values) |                                                     |         |           |
|                                                                |                                                                                                                                                                                    |                                                      | Low dose                                            |         | High Dose |
|                                                                |                                                                                                                                                                                    | Clozapine + Amphetamine                              | <0.0001                                             |         | 0.0003    |
| Haloperidol + Amphetamine                                      | 0.0001                                                                                                                                                                             | 0.0025                                               |                                                     |         |           |
| MP-10 + Amphetamine                                            | 0.2757                                                                                                                                                                             | 0.0407                                               |                                                     |         |           |
| Fig. 3b                                                        | D1-SPN proximal cell co-activity (20-100 μm), first normalized to shuffled and then normalized to vehicle treatment, at rest (Vehicle vs Amphetamine)                              | Wilcoxon signed-rank                                 | 0.0244                                              | N = 11  |           |
|                                                                | D1-SPN proximal cell co-activity (20-100 μm), first normalized to shuffled and then normalized to vehicle treatment, at rest (Vehicle + Amphetamine vs Drug + Amphetamine)         | Mixed-effects model                                  | <0.0001                                             |         |           |
|                                                                |                                                                                                                                                                                    | Multiple comparisons (Holm-Sidak corrected p-values) |                                                     |         |           |
|                                                                |                                                                                                                                                                                    |                                                      | Low dose                                            |         | High Dose |
|                                                                |                                                                                                                                                                                    | Clozapine + Amphetamine                              | 0.0038                                              |         | <0.0001   |
| Haloperidol + Amphetamine                                      | 0.0435                                                                                                                                                                             | 0.0002                                               |                                                     |         |           |
| MP-10 + Amphetamine                                            | 0.6752                                                                                                                                                                             | 0.6752                                               |                                                     |         |           |
| Fig. 3c                                                        | D2-SPN event rates, normalized to vehicle, during movement (Vehicle vs Amphetamine)                                                                                                | Wilcoxon signed-rank                                 | 0.0020                                              | N = 10  |           |
|                                                                | D2-SPN event rates during movement across drug treatments (Vehicle + Amphetamine vs Drug + Amphetamine)                                                                            | One-way repeated measures ANOVA                      | <0.0001                                             |         |           |
|                                                                |                                                                                                                                                                                    | Multiple comparisons (Holm-Sidak corrected p-values) |                                                     |         |           |
|                                                                |                                                                                                                                                                                    |                                                      | Low dose                                            |         | High Dose |
|                                                                |                                                                                                                                                                                    | Clozapine + Amphetamine                              | 0.7231                                              |         | 0.8177    |
| Haloperidol + Amphetamine                                      | 0.3003                                                                                                                                                                             | 0.0005                                               |                                                     |         |           |
| MP-10 + Amphetamine                                            | 0.0421                                                                                                                                                                             | <0.0001                                              |                                                     |         |           |
| Fig. 3d                                                        | D2-SPN proximal cell co-activity (20-100 μm), first normalized to shuffled and then normalized to vehicle treatment, during movement (Vehicle vs Amphetamine)                      | Wilcoxon signed-rank                                 | 0.0078                                              | N = 10  |           |
|                                                                | D2-SPN proximal cell co-activity (20-100 μm), first normalized to shuffled and then normalized to vehicle treatment, during movement (Vehicle + Amphetamine vs Drug + Amphetamine) | Mixed-effects model                                  | 0.0001                                              |         |           |
|                                                                |                                                                                                                                                                                    | Multiple comparisons (Holm-Sidak corrected p-values) |                                                     |         |           |
|                                                                |                                                                                                                                                                                    |                                                      | Low dose                                            |         | High Dose |
|                                                                |                                                                                                                                                                                    | Clozapine + Amphetamine                              | 0.1929                                              |         | 0.0906    |
| Haloperidol + Amphetamine                                      | 0.9206                                                                                                                                                                             | 0.9206                                               |                                                     |         |           |
| MP-10 + Amphetamine                                            | 0.7495                                                                                                                                                                             | 0.0216                                               |                                                     |         |           |
| Fig. 3g                                                        | Percent PPI (Vehicle vs Amphetamine)                                                                                                                                               | Two-way repeated measures ANOVA                      | Treat: 0.0006<br>dB: <0.0001<br>Interaction: 0.2112 | N = 11  |           |
|                                                                |                                                                                                                                                                                    | Multiple comparisons (Holm-Sidak corrected p-values) |                                                     |         |           |
|                                                                |                                                                                                                                                                                    |                                                      | 4dB                                                 |         | 8dB       |
| Vehicle + Amphetamine                                          | <0.0001                                                                                                                                                                            | <0.0001                                              | <0.0001                                             |         |           |
| Fig. 3h                                                        | Mean percent PPI (Vehicle vs Vehicle + Amphetamine vs Drug + Amphetamine)                                                                                                          | One-way repeated measures ANOVA                      | <0.0001                                             | N = 11  |           |
|                                                                | Mean percent PPI (Vehicle vs Amphetamine or Drug + Amphetamine)                                                                                                                    | Multiple comparisons (Holm-Sidak corrected p-values) |                                                     |         |           |
|                                                                |                                                                                                                                                                                    | Vehicle + Amphetamine                                | <0.0001                                             |         |           |
|                                                                |                                                                                                                                                                                    | Clozapine + Amphetamine                              | 0.5174                                              |         |           |
|                                                                |                                                                                                                                                                                    | Haloperidol + Amphetamine                            | 0.9142                                              |         |           |
| MP-10 + Amphetamine                                            | 0.0003                                                                                                                                                                             |                                                      |                                                     |         |           |
| Mean percent PPI (Vehicle + Amphetamine vs Drug + Amphetamine) | Clozapine + Amphetamine                                                                                                                                                            | <0.0001                                              |                                                     |         |           |
|                                                                | Haloperidol + Amphetamine                                                                                                                                                          | <0.0001                                              |                                                     |         |           |
|                                                                | MP-10 + Amphetamine                                                                                                                                                                | 0.2932                                               |                                                     |         |           |

1035

| Figure  | Comparison                                                                                                                          | Test                            | p-value                                                | N-value |
|---------|-------------------------------------------------------------------------------------------------------------------------------------|---------------------------------|--------------------------------------------------------|---------|
| Fig. 4b | Locomotor speeds following DCZ treatments in DIO-hM4D(Gi)-mCherry injected D1-cre mice (Vehicle vs DCZ)                             | Two-way repeated measures ANOVA | Speed: <0.0001<br>Drug: <0.0001<br>Interaction: 0.4767 | N = 10  |
|         | Locomotor speeds following DCZ treatments in DIO-hM4D(Gi)-mCherry injected D1-cre mice (Vehicle + Amphetamine vs DCZ + Amphetamine) | Two-way repeated measures ANOVA | Speed: <0.0001<br>Drug: <0.0001<br>Interaction: 0.0518 |         |
|         | Locomotor speeds following DCZ treatments in DIO-mCherry injected D1-cre mice (Vehicle vs DCZ)                                      | Two-way repeated measures ANOVA | Speed: 0.5855<br>Drug: 0.7750<br>Interaction: 0.6221   |         |
|         | Locomotor speeds following DCZ treatments in DIO-mCherry injected D1-cre mice (Vehicle + Amphetamine vs DCZ + Amphetamine)          | Two-way repeated measures ANOVA | Speed: 0.0438<br>Drug: 0.0780<br>Interaction: 0.7569   |         |

1036

| Figure                                                                                                   | Comparison                                                                                                                   | Test                                                        | p-value |      | N-value |
|----------------------------------------------------------------------------------------------------------|------------------------------------------------------------------------------------------------------------------------------|-------------------------------------------------------------|---------|------|---------|
|                                                                                                          |                                                                                                                              |                                                             | Speed   | Drug |         |
| Fig. 4c                                                                                                  | Mean percent PPI in DIO-hM4D(Gi)-mCherry injected D1-cre mice (Vehicle vs DCZ vs Vehicle + Amphetamine vs DCZ + Amphetamine) | One-way repeated measures ANOVA                             | <0.0001 |      | N = 5   |
|                                                                                                          |                                                                                                                              | <b>Multiple comparisons (Holm-Sidak corrected p-values)</b> |         |      |         |
|                                                                                                          |                                                                                                                              | DCZ                                                         | 0.2698  |      |         |
|                                                                                                          |                                                                                                                              | Vehicle + Amphetamine                                       | <0.0001 |      |         |
|                                                                                                          |                                                                                                                              | DCZ + Amphetamine                                           | 0.0108  |      |         |
|                                                                                                          | Mean percent PPI in DIO-hM4D(Gi)-mCherry injected D1-cre mice (Vehicle vs DCZ vs Amphetamine or DCZ + Amphetamine)           | DCZ                                                         | <0.0001 |      |         |
|                                                                                                          |                                                                                                                              | DCZ + Amphetamine                                           | 0.0108  |      |         |
|                                                                                                          | Mean percent PPI in DIO-mCherry injected D1-cre mice (Vehicle vs DCZ vs Vehicle + Amphetamine vs DCZ + Amphetamine)          | One-way repeated measures ANOVA                             | <0.0001 |      |         |
|                                                                                                          |                                                                                                                              | <b>Multiple comparisons (Holm-Sidak corrected p-values)</b> |         |      |         |
|                                                                                                          |                                                                                                                              | DCZ                                                         | 0.6317  |      |         |
|                                                                                                          |                                                                                                                              | Vehicle + Amphetamine                                       | 0.0004  |      |         |
|                                                                                                          |                                                                                                                              | DCZ + Amphetamine                                           | 0.0006  |      |         |
| Mean percent PPI in DIO-mCherry injected D1-cre mice (Vehicle + Amphetamine vs DCZ or DCZ + Amphetamine) | DCZ                                                                                                                          | 0.0001                                                      |         |      |         |
|                                                                                                          | DCZ + Amphetamine                                                                                                            | 0.6317                                                      |         |      |         |

1037

1038

| Figure                                                      | Comparison                                                                                            | Test                                                        | p-value  |           | N-value |
|-------------------------------------------------------------|-------------------------------------------------------------------------------------------------------|-------------------------------------------------------------|----------|-----------|---------|
|                                                             |                                                                                                       |                                                             | Speed    | Drug      |         |
| Fig. 5b                                                     | Locomotor speeds following low dose of drug treatments (Vehicle vs Drug)                              | Two-way repeated measures ANOVA                             | <0.0001  | <0.0001   | N = 31  |
|                                                             |                                                                                                       | <b>Multiple comparisons (Holm-Sidak corrected p-values)</b> |          |           |         |
|                                                             |                                                                                                       | VU0467154                                                   | 0.0017   |           |         |
|                                                             |                                                                                                       | SKF38393                                                    | <0.0001  |           |         |
|                                                             | SCH23390                                                                                              | <0.0001                                                     |          |           |         |
|                                                             | Locomotor speeds following low dose of drug treatments (Vehicle + Amphetamine vs Drug + Amphetamine)  | Two-way repeated measures ANOVA                             | <0.0001  | <0.0001   |         |
|                                                             |                                                                                                       | <b>Multiple comparisons (Holm-Sidak corrected p-values)</b> |          |           |         |
|                                                             |                                                                                                       | VU0467154                                                   | <0.0001  |           |         |
|                                                             |                                                                                                       | SKF38393                                                    | <0.0001  |           |         |
|                                                             | SCH23390                                                                                              | <0.0001                                                     |          |           |         |
|                                                             | Locomotor speeds following high dose of drug treatments (Vehicle vs Drug)                             | Two-way repeated measures ANOVA                             | 0.0056   | <0.0001   |         |
|                                                             |                                                                                                       | <b>Multiple comparisons (Holm-Sidak corrected p-values)</b> |          |           |         |
|                                                             |                                                                                                       | VU0467154                                                   | 0.0013   |           |         |
|                                                             |                                                                                                       | SKF38393                                                    | <0.0001  |           |         |
|                                                             | SCH23390                                                                                              | <0.0001                                                     |          |           |         |
|                                                             | Locomotor speeds following High dose of drug treatments (Vehicle + Amphetamine vs Drug + Amphetamine) | Two-way repeated measures ANOVA                             | <0.0001  | <0.0001   |         |
| <b>Multiple comparisons (Holm-Sidak corrected p-values)</b> |                                                                                                       |                                                             |          |           |         |
| VU0467154                                                   |                                                                                                       | <0.0001                                                     |          |           |         |
| SKF38393                                                    |                                                                                                       | <0.0001                                                     |          |           |         |
| SCH23390                                                    | <0.0001                                                                                               |                                                             |          |           |         |
| Fig. 5c                                                     | D1-SPN event rates at rest across drug treatments (Vehicle vs Drug)                                   | Mixed-effects model                                         | <0.0001  |           | N = 11  |
|                                                             |                                                                                                       | <b>Multiple comparisons (Holm-Sidak corrected p-values)</b> |          |           |         |
|                                                             |                                                                                                       |                                                             | Low dose | High Dose |         |
|                                                             |                                                                                                       | VU0467154                                                   | 0.6031   | 0.6031    |         |
|                                                             |                                                                                                       | SKF38393                                                    | 0.0806   | <0.0001   |         |
|                                                             | SCH23390                                                                                              | 0.4633                                                      | 0.0082   |           |         |
|                                                             | D1-SPN event rates during movement across drug treatments (Vehicle vs Drug)                           | Mixed-effects model                                         | <0.0001  |           |         |
|                                                             |                                                                                                       | <b>Multiple comparisons (Holm-Sidak corrected p-values)</b> |          |           |         |
|                                                             |                                                                                                       |                                                             | Low dose | High Dose |         |
|                                                             |                                                                                                       | VU0467154                                                   | 0.8344   | 0.9932    |         |
| SKF38393                                                    |                                                                                                       | 0.4053                                                      | <0.0001  |           |         |
| SCH23390                                                    | 0.9932                                                                                                | 0.0159                                                      |          |           |         |

1039

1040

|          |                                                                             |                                                      |          |           |        |  |
|----------|-----------------------------------------------------------------------------|------------------------------------------------------|----------|-----------|--------|--|
| Fig. 5d  | D2-SPN event rates at rest across drug treatments (Vehicle vs Drug)         | Mixed-effects model                                  | 0.0260   |           | N = 10 |  |
|          |                                                                             | Multiple comparisons (Holm-Sidak corrected p-values) |          |           |        |  |
|          |                                                                             |                                                      | Low dose | High Dose |        |  |
|          |                                                                             | VU0467154                                            | 0.9415   | 0.8887    |        |  |
|          |                                                                             | SKF38393                                             | 0.7189   | 0.0082    |        |  |
|          | SCH23390                                                                    | 0.8674                                               | 0.5353   |           |        |  |
|          | D2-SPN event rates during movement across drug treatments (Vehicle vs Drug) | Mixed-effects model                                  | 0.0522   |           |        |  |
|          |                                                                             | Multiple comparisons (Holm-Sidak corrected p-values) |          |           |        |  |
|          |                                                                             |                                                      | Low dose | High Dose |        |  |
|          |                                                                             | VU0467154                                            | 0.9701   | 0.9701    |        |  |
| SKF38393 |                                                                             | 0.9972                                               | 0.9701   |           |        |  |
| SCH23390 | 0.6358                                                                      | 0.0171                                               |          |           |        |  |

1041

1042

1043

1044

| Figure                    | Comparison                                                                                                                                                                         | Test                                                 | p-value  |           | N-value |  |
|---------------------------|------------------------------------------------------------------------------------------------------------------------------------------------------------------------------------|------------------------------------------------------|----------|-----------|---------|--|
| Fig. 6a                   | D1-SPN event rates, normalized to vehicle, at rest (Vehicle vs Amphetamine)                                                                                                        | Wilcoxon signed-rank                                 | 0.0098   |           | N = 11  |  |
|                           | D1-SPN event rates at rest across drug treatments (Vehicle + Amphetamine vs Drug + Amphetamine)                                                                                    | Mixed-effects model                                  | 0.0015   |           |         |  |
|                           |                                                                                                                                                                                    | Multiple comparisons (Holm-Sidak corrected p-values) |          |           |         |  |
|                           |                                                                                                                                                                                    |                                                      | Low dose | High Dose |         |  |
|                           |                                                                                                                                                                                    | VU0467154 + Amphetamine                              | 0.0603   | 0.0036    |         |  |
| SCK38393 + Amphetamine    | 0.0278                                                                                                                                                                             | 0.0183                                               |          |           |         |  |
| SCH23390 + Amphetamine    | 0.0318                                                                                                                                                                             | 0.0001                                               |          |           |         |  |
| Fig. 6b                   | D1-SPN proximal cell co-activity (20-100 μm), first normalized to shuffled and then normalized to vehicle treatment, at rest (Vehicle vs Amphetamine)                              | Wilcoxon signed-rank                                 | 0.0244   |           | N = 11  |  |
|                           | D1-SPN proximal cell co-activity (20-100 μm), first normalized to shuffled and then normalized to vehicle treatment, at rest (Vehicle + Amphetamine vs Drug + Amphetamine)         | Mixed-effects model                                  | 0.0004   |           |         |  |
|                           |                                                                                                                                                                                    | Multiple comparisons (Holm-Sidak corrected p-values) |          |           |         |  |
|                           |                                                                                                                                                                                    |                                                      | Low dose | High Dose |         |  |
|                           |                                                                                                                                                                                    | VU0467154 + Amphetamine                              | 0.7149   | 0.0334    |         |  |
| SCK38393 + Amphetamine    | 0.7149                                                                                                                                                                             | 0.6659                                               |          |           |         |  |
| SCH23390 + Amphetamine    | 0.0316                                                                                                                                                                             | 0.0053                                               |          |           |         |  |
| Fig. 6c                   | D2-SPN event rates, normalized to vehicle, during movement (Vehicle vs Amphetamine)                                                                                                | Wilcoxon signed-rank                                 | 0.0020   |           | N = 10  |  |
|                           | D2-SPN event rates during movement across drug treatments (Vehicle + Amphetamine vs Drug + Amphetamine)                                                                            | Mixed-effects model                                  | <0.0001  |           |         |  |
|                           |                                                                                                                                                                                    | Multiple comparisons (Holm-Sidak corrected p-values) |          |           |         |  |
|                           |                                                                                                                                                                                    |                                                      | Low dose | High Dose |         |  |
|                           |                                                                                                                                                                                    | VU0467154 + Amphetamine                              | 0.8992   | 0.1931    |         |  |
| SCK38393 + Amphetamine    | 0.3861                                                                                                                                                                             | 0.3861                                               |          |           |         |  |
| SCH23390 + Amphetamine    | 0.0005                                                                                                                                                                             | 0.0695                                               |          |           |         |  |
| Fig. 6d                   | D2-SPN proximal cell co-activity (20-100 μm), first normalized to shuffled and then normalized to vehicle treatment, during movement (Vehicle vs Amphetamine)                      | Wilcoxon signed-rank                                 | 0.0078   |           | N = 10  |  |
|                           | D2-SPN proximal cell co-activity (20-100 μm), first normalized to shuffled and then normalized to vehicle treatment, during movement (Vehicle + Amphetamine vs Drug + Amphetamine) | Mixed-effects model                                  | 0.0945   |           |         |  |
|                           |                                                                                                                                                                                    | Multiple comparisons (Holm-Sidak corrected p-values) |          |           |         |  |
|                           |                                                                                                                                                                                    |                                                      | Low dose | High Dose |         |  |
|                           |                                                                                                                                                                                    | VU0467154 + Amphetamine                              | 0.9712   | 0.9712    |         |  |
| SCK38393 + Amphetamine    | 0.9684                                                                                                                                                                             | 0.1141                                               |          |           |         |  |
| SCH23390 + Amphetamine    | 0.9712                                                                                                                                                                             | 0.5083                                               |          |           |         |  |
| Fig. 6g                   | Mean percent PPI (Vehicle vs Vehicle + Amphetamine vs Drug + Amphetamine)                                                                                                          | One-way repeated measures ANOVA                      | <0.0001  |           | N = 11  |  |
|                           | Multiple comparisons (Holm-Sidak corrected p-values)                                                                                                                               |                                                      |          |           |         |  |
|                           |                                                                                                                                                                                    | Vehicle + Amphetamine                                | <0.0001  |           |         |  |
|                           | Mean percent PPI (Vehicle vs Amphetamine or Drug + Amphetamine)                                                                                                                    | Clozapine + Amphetamine                              | <0.0001  |           |         |  |
|                           |                                                                                                                                                                                    | Haloperidol + Amphetamine                            | 0.0388   |           |         |  |
|                           |                                                                                                                                                                                    | MP-10 + Amphetamine                                  | 0.0003   |           |         |  |
|                           | Mean percent PPI (Vehicle + Amphetamine vs Drug + Amphetamine)                                                                                                                     | Clozapine + Amphetamine                              | <0.0001  |           |         |  |
| Haloperidol + Amphetamine |                                                                                                                                                                                    | <0.0001                                              |          |           |         |  |
| MP-10 + Amphetamine       |                                                                                                                                                                                    | <0.0001                                              |          |           |         |  |

| Figure                   | Comparison                                          | Test                                                 | p-value                                                      | N-value                                              |                                                         |                                                         |        |           |
|--------------------------|-----------------------------------------------------|------------------------------------------------------|--------------------------------------------------------------|------------------------------------------------------|---------------------------------------------------------|---------------------------------------------------------|--------|-----------|
| Extended Data Fig. 2a    | Locomotor speeds across drug treatments (Drug only) | Two-way repeated measures ANOVA                      | Speed: <0.0001<br>Drug: <0.0002<br>Interaction: 0.0009       | N = 31                                               |                                                         |                                                         |        |           |
|                          |                                                     | Multiple comparisons (Holm-Sidak corrected p-values) |                                                              |                                                      |                                                         |                                                         |        |           |
|                          |                                                     |                                                      | Low dose                                                     |                                                      | High dose                                               |                                                         |        |           |
|                          |                                                     | Vehicle vs Clozapine                                 | <0.0001                                                      |                                                      | <0.0001                                                 |                                                         |        |           |
|                          |                                                     | Vehicle vs Haloperidol                               | <0.0001                                                      |                                                      | <0.0001                                                 |                                                         |        |           |
|                          |                                                     | Vehicle vs MP-10                                     | <0.0001                                                      |                                                      | <0.0001                                                 |                                                         |        |           |
|                          |                                                     |                                                      | Low dose                                                     |                                                      | High dose                                               |                                                         |        |           |
|                          |                                                     | Clozapine vs Haloperidol                             | <0.0001                                                      |                                                      | 0.3988                                                  |                                                         |        |           |
|                          |                                                     | Clozapine vs MP-10                                   | 0.3121                                                       |                                                      | 0.3988                                                  |                                                         |        |           |
|                          |                                                     | Haloperidol vs MP-10                                 | <0.0001                                                      |                                                      | 0.1048                                                  |                                                         |        |           |
|                          |                                                     | Extended Data Fig. 2b                                | Locomotor speeds across drug treatments (Drug + Amphetamine) |                                                      | Two-way repeated measures ANOVA                         | Speed: <0.0001<br>Drug: <0.0001<br>Interaction: <0.0001 | N = 31 |           |
|                          |                                                     |                                                      |                                                              |                                                      | Multiple comparisons (Holm-Sidak corrected p-values)    |                                                         |        |           |
|                          |                                                     |                                                      |                                                              |                                                      |                                                         | Low dose                                                |        | High dose |
|                          |                                                     |                                                      |                                                              |                                                      | Vehicle vs Clozapine                                    | <0.0001                                                 |        | <0.0001   |
| Vehicle vs Haloperidol   | <0.0001                                             |                                                      |                                                              | <0.0001                                              |                                                         |                                                         |        |           |
| Vehicle vs MP-10         | <0.0001                                             |                                                      |                                                              | <0.0001                                              |                                                         |                                                         |        |           |
|                          | Low dose                                            |                                                      |                                                              | High dose                                            |                                                         |                                                         |        |           |
| Clozapine vs Haloperidol | 0.0701                                              |                                                      |                                                              | <0.0001                                              |                                                         |                                                         |        |           |
| Clozapine vs MP-10       | 0.0247                                              |                                                      |                                                              | 0.0001                                               |                                                         |                                                         |        |           |
| Haloperidol vs MP-10     | <0.0001                                             |                                                      |                                                              | <0.0001                                              |                                                         |                                                         |        |           |
| Extended Data Fig. 2b    | Locomotor speeds across drug treatments (Drug only) |                                                      |                                                              | Two-way repeated measures ANOVA                      | Speed: 0.0017<br>Drug: <0.0001<br>Interaction: <0.0001  | N = 31                                                  |        |           |
|                          |                                                     |                                                      |                                                              | Multiple comparisons (Holm-Sidak corrected p-values) |                                                         |                                                         |        |           |
|                          |                                                     |                                                      |                                                              |                                                      | Low dose                                                |                                                         |        | High dose |
|                          |                                                     |                                                      |                                                              | Vehicle vs VU0467154                                 | 0.0081                                                  |                                                         |        | 0.0006    |
|                          |                                                     | Vehicle vs SKF38393                                  | <0.0001                                                      | <0.0001                                              |                                                         |                                                         |        |           |
|                          |                                                     | Vehicle vs SCH23390                                  | <0.0001                                                      | <0.0001                                              |                                                         |                                                         |        |           |
|                          |                                                     |                                                      | Low dose                                                     | High dose                                            |                                                         |                                                         |        |           |
|                          |                                                     | VU0467154 vs SKF38393                                | <0.0001                                                      | <0.0001                                              |                                                         |                                                         |        |           |
|                          |                                                     | VU0467154 vs SCH23390                                | <0.0001                                                      | <0.0001                                              |                                                         |                                                         |        |           |
|                          |                                                     | SKF38393 vs SCH23390                                 | <0.0001                                                      | <0.0001                                              |                                                         |                                                         |        |           |
|                          |                                                     | Extended Data Fig. 2b                                | Locomotor speeds across drug treatments (Drug + Amphetamine) | Two-way repeated measures ANOVA                      | Speed: <0.0001<br>Drug: <0.0001<br>Interaction: <0.0001 |                                                         | N = 31 |           |
|                          |                                                     |                                                      |                                                              | Multiple comparisons (Holm-Sidak corrected p-values) |                                                         |                                                         |        |           |
|                          |                                                     |                                                      |                                                              |                                                      | Low dose                                                |                                                         |        | High dose |
|                          |                                                     |                                                      |                                                              | Vehicle vs VU0467154                                 | <0.0001                                                 |                                                         |        | <0.0001   |
| Vehicle vs SKF38393      | <0.0001                                             |                                                      |                                                              | <0.0001                                              |                                                         |                                                         |        |           |
| Vehicle vs SCH23390      | <0.0001                                             |                                                      |                                                              | <0.0001                                              |                                                         |                                                         |        |           |
|                          | Low dose                                            |                                                      |                                                              | High dose                                            |                                                         |                                                         |        |           |
| VU0467154 vs SKF38393    | 0.2378                                              |                                                      |                                                              | 0.0001                                               |                                                         |                                                         |        |           |
| VU0467154 vs SCH23390    | <0.0001                                             |                                                      |                                                              | <0.0001                                              |                                                         |                                                         |        |           |
| SKF38393 vs SCH23390     | <0.0001                                             |                                                      |                                                              | <0.0001                                              |                                                         |                                                         |        |           |

1045

| Figure                | Comparison                                                                                                                                                  | Test                                                 | p-value  | N-value |           |           |
|-----------------------|-------------------------------------------------------------------------------------------------------------------------------------------------------------|------------------------------------------------------|----------|---------|-----------|-----------|
| Extended Data Fig. 3a | D1-SPN proximal cell co-activity (20-100 $\mu$ m), first normalized to shuffled and then normalized to vehicle treatment, at rest (Vehicle vs Drug)         | Mixed-effects model                                  | 0.1065   | N = 11  |           |           |
|                       |                                                                                                                                                             | Multiple comparisons (Holm-Sidak corrected p-values) |          |         |           |           |
|                       |                                                                                                                                                             |                                                      | Low dose |         | High Dose |           |
|                       |                                                                                                                                                             | Clozapine                                            | 0.9892   |         | 0.9892    |           |
|                       |                                                                                                                                                             | Haloperidol                                          | 0.5386   |         | 0.9892    |           |
|                       | MP-10                                                                                                                                                       | 0.0806                                               | 0.9892   |         |           |           |
|                       | D1-SPN proximal cell co-activity (20-100 $\mu$ m), first normalized to shuffled and then normalized to vehicle treatment, during movement (Vehicle vs Drug) | Mixed-effects model                                  | 0.0331   |         | N = 11    |           |
|                       |                                                                                                                                                             | Multiple comparisons (Holm-Sidak corrected p-values) |          |         |           |           |
|                       |                                                                                                                                                             |                                                      | Low dose |         |           | High Dose |
|                       |                                                                                                                                                             | Clozapine                                            | 0.0397   |         |           | 0.9330    |
| Haloperidol           |                                                                                                                                                             | 0.3520                                               | 0.9587   |         |           |           |
| MP-10                 | 0.1137                                                                                                                                                      | 0.9330                                               |          |         |           |           |

1046

|                          |                                                                                                                                                                   |                                                      |               |           |        |  |
|--------------------------|-------------------------------------------------------------------------------------------------------------------------------------------------------------------|------------------------------------------------------|---------------|-----------|--------|--|
| Extended Data<br>Fig. 3b | D2-SPN proximal cell co-activity (20-100 $\mu$ m),<br>first normalized to shuffled and then normalized to vehicle<br>treatment, at rest (Vehicle vs Drug)         | Mixed-effects<br>model                               | <b>0.0264</b> |           | N = 10 |  |
|                          |                                                                                                                                                                   | Multiple comparisons (Holm-Sidak corrected p-values) |               |           |        |  |
|                          |                                                                                                                                                                   |                                                      | Low dose      | High Dose |        |  |
|                          |                                                                                                                                                                   | Clozapine                                            | 0.5303        | 0.0514    |        |  |
|                          | Haloperidol                                                                                                                                                       | 0.5303                                               | 0.4105        |           |        |  |
|                          | MP-10                                                                                                                                                             | 0.7791                                               | 0.7791        |           |        |  |
| Extended Data<br>Fig. 3b | D2-SPN proximal cell co-activity (20-100 $\mu$ m),<br>first normalized to shuffled and then normalized to vehicle<br>treatment, during movement (Vehicle vs Drug) | Mixed-effects<br>model                               | <b>0.0046</b> |           |        |  |
|                          |                                                                                                                                                                   | Multiple comparisons (Holm-Sidak corrected p-values) |               |           |        |  |
|                          |                                                                                                                                                                   |                                                      | Low dose      | High Dose |        |  |
|                          |                                                                                                                                                                   | Clozapine                                            | 0.5459        | 0.0587    |        |  |
|                          | Haloperidol                                                                                                                                                       | 0.5459                                               | 0.0797        |           |        |  |
|                          | MP-10                                                                                                                                                             | 0.5459                                               | 0.4449        |           |        |  |
| Extended Data<br>Fig. 3c | D1-SPN proximal cell co-activity (20-100 $\mu$ m),<br>first normalized to shuffled and then normalized to vehicle<br>treatment, at rest (Vehicle vs Drug)         | Mixed-effects<br>model                               | 0.1494        |           | N = 11 |  |
|                          |                                                                                                                                                                   | Multiple comparisons (Holm-Sidak corrected p-values) |               |           |        |  |
|                          |                                                                                                                                                                   |                                                      | Low dose      | High Dose |        |  |
|                          |                                                                                                                                                                   | VU0467154                                            | 0.9656        | 0.9656    |        |  |
|                          | SKF38393                                                                                                                                                          | 0.9198                                               | 0.8907        |           |        |  |
|                          | SCH23390                                                                                                                                                          | 0.8907                                               | 0.2501        |           |        |  |
| Extended Data<br>Fig. 3c | D1-SPN proximal cell co-activity (20-100 $\mu$ m),<br>first normalized to shuffled and then normalized to vehicle<br>treatment, during movement (Vehicle vs Drug) | Mixed-effects<br>model                               | 0.0777        |           |        |  |
|                          |                                                                                                                                                                   | Multiple comparisons (Holm-Sidak corrected p-values) |               |           |        |  |
|                          |                                                                                                                                                                   |                                                      | Low dose      | High Dose |        |  |
|                          |                                                                                                                                                                   | VU0467154                                            | 0.9718        | 0.9718    |        |  |
|                          | SKF38393                                                                                                                                                          | 0.7316                                               | 0.2568        |           |        |  |
|                          | SCH23390                                                                                                                                                          | 0.9718                                               | 0.2532        |           |        |  |
| Extended Data<br>Fig. 3d | D2-SPN proximal cell co-activity (20-100 $\mu$ m),<br>first normalized to shuffled and then normalized to vehicle<br>treatment, at rest (Vehicle vs Drug)         | Mixed-effects<br>model                               | 0.3759        |           | N = 10 |  |
|                          |                                                                                                                                                                   | Multiple comparisons (Holm-Sidak corrected p-values) |               |           |        |  |
|                          |                                                                                                                                                                   |                                                      | Low dose      | High Dose |        |  |
|                          |                                                                                                                                                                   | VU0467154                                            | 0.9885        | 0.9885    |        |  |
|                          | SKF38393                                                                                                                                                          | 0.9115                                               | 0.8109        |           |        |  |
|                          | SCH23390                                                                                                                                                          | 0.8882                                               | 0.1771        |           |        |  |
| Extended Data<br>Fig. 3d | D2-SPN proximal cell co-activity (20-100 $\mu$ m),<br>first normalized to shuffled and then normalized to vehicle<br>treatment, during movement (Vehicle vs Drug) | Mixed-effects<br>model                               | 0.7727        |           |        |  |
|                          |                                                                                                                                                                   | Multiple comparisons (Holm-Sidak corrected p-values) |               |           |        |  |
|                          |                                                                                                                                                                   |                                                      | Low dose      | High Dose |        |  |
|                          |                                                                                                                                                                   | VU0467154                                            | 0.8594        | 0.9893    |        |  |
|                          | SKF38393                                                                                                                                                          | 0.7161                                               | 0.8426        |           |        |  |
|                          | SCH23390                                                                                                                                                          | 0.9893                                               | 0.9893        |           |        |  |

1047

| Figure                   | Comparison                                                      | Test                                                 | p-value       | N-value |  |
|--------------------------|-----------------------------------------------------------------|------------------------------------------------------|---------------|---------|--|
| Extended Data<br>Fig. 4d | Number of action potential responses<br>(Vehicle vs DCZ or CNO) | One-way repeated<br>measures ANOVA                   | <b>0.0325</b> | N = 4   |  |
|                          |                                                                 | Multiple comparisons (Holm-Sidak corrected p-values) |               |         |  |
|                          |                                                                 | DCZ (0.1 $\mu$ M)                                    | <b>0.0383</b> |         |  |
|                          |                                                                 | DCZ (1 $\mu$ M)                                      | <b>0.0383</b> |         |  |
|                          | CNO (10 $\mu$ M)                                                | <b>0.0246</b>                                        |               |         |  |

1048
